# Supplementary material for: Understanding how and why quality circles improve standards of practice, enhance professional development and increase psychological well-being of general practitioners: a realist synthesis
Source: PubMed Central journal article supplement — BMJ Open. 2022 May 3;12(5):e058453. doi: 10.1136/bmjopen-2021-058453 (PMC9073411; doi:10.1136/bmjopen-2021-058453), 2022-05-03
Supplement: bmjopen-2021-058453supp001.pdf [file bmjopen-2021-058453supp001.pdf]

**Supplemental material 1****Experts and stakeholders participating in interviews and focus groups**

| <b>Experts / groups</b>                                                                                        | <b>Type of qualitative data</b> | <b>Date and location</b> | <b>Length of time</b> |
|----------------------------------------------------------------------------------------------------------------|---------------------------------|--------------------------|-----------------------|
| CEO of a network of primary health care centres owned by a health insurance company                            | Interview                       | 01/05/2013<br>Zürich     | 1½ h                  |
| Tutor in a doctor-owned network of primary health care centres                                                 | Interview                       | 02/05/2013<br>Bern       | 1½ h                  |
| Two social scientists, representatives of the professional body, Swiss Medical Association                     | Interview                       | 02/05/2013<br>Bern       | 1½ h                  |
| 8 Participants, GPs, and a QC facilitator a doctor-owned network of primary health care centres                | Focus group                     | 14/05/2013<br>Zürich     | 1¼ h                  |
| Member of the management board of a network of primary health care centres owned by health insurance companies | Interview                       | 15/05/2013<br>Bern       | 1¼ h                  |
| 12 Representatives of the quality committee of the Swiss Society of General Internal Medicine, GPs             | Focus group                     | 13/06/2013<br>Bern       | 1h                    |
| 24 delegates of the European Society of Quality and Safety in Family Medicine, all GPs                         | Focus group                     | 16/11/2013<br>Bologna    | 1h                    |
