# Supplementary material for: Understanding how and why quality circles improve standards of practice, enhance professional development and increase psychological well-being of general practitioners: a realist synthesis
Source: PubMed Central journal article supplement — BMJ Open. 2022 May 3;12(5):e058453. doi: 10.1136/bmjopen-2021-058453 (PMC9073411; doi:10.1136/bmjopen-2021-058453), 2022-05-03
Supplement: bmjopen-2021-058453supp003.pdf [file bmjopen-2021-058453supp003.pdf]

## Supplemental material 3

## CMO configurations across studies and demi-regularities

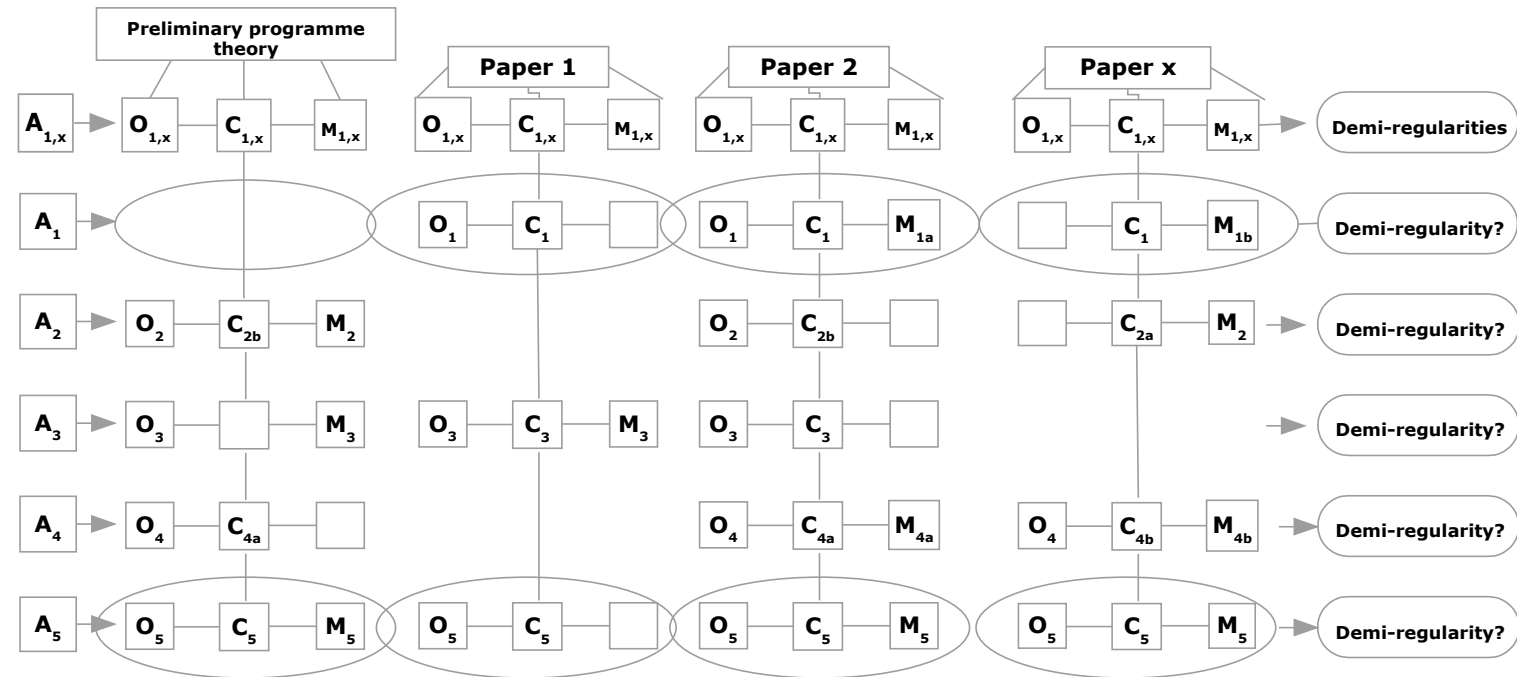

## Legend

A: Activity. Activities 1 to 5.

O: Outcome. Outcomes 1 to 5.

C: Context. Contexts 1 to 5, although some may be missing.

M: Mechanism. Mechanisms at different levels of activity; the same outcome may have several mechanisms; if no mechanism was mentioned, the square is blank.

Comparing groups of CMOs across studies may create a demi-regularity.

The marked demi-regularities are examples of how I built CMO configurations across the papers.
