# Supplementary material for: Understanding how and why quality circles improve standards of practice, enhance professional development and increase psychological well-being of general practitioners: a realist synthesis
Source: PubMed Central journal article supplement — BMJ Open. 2022 May 3;12(5):e058453. doi: 10.1136/bmjopen-2021-058453 (PMC9073411; doi:10.1136/bmjopen-2021-058453), 2022-05-03
Supplement: bmjopen-2021-058453supp004.pdf [file bmjopen-2021-058453supp004.pdf]

#### Supplementary material 4 Participants in interviews and focus groups, refining the literature-based programme theory

|                                                                                                                | Type of qualitative data | Date and location        | Length of time |
|----------------------------------------------------------------------------------------------------------------|--------------------------|--------------------------|----------------|
| <b>Participants: number of people</b>                                                                          |                          |                          |                |
| CEO of a network of primary health care centres owned by a health insurance company                            | Interview                | 18/03/2015<br>Wil        | 23'26''        |
| Tutor in a doctor-owned network of primary health care centres                                                 | Interview                | 19/03/2015<br>Bern       | 64'21''        |
| Member of the management board of a network of primary health care centres owned by health insurance companies | Interview                | 25/03/2015<br>Bern       | 42'40''        |
| Two social scientists, representatives of the professional body Swiss Association of Medicine                  | Interview                | 02/04/2015<br>Bern       | 72'47''        |
| Researcher in a doctor-owned network of primary health care centres                                            | Interview                | 02/04/2015<br>Zurich     | 61'26''        |
| Group of 21 GPs at the open meeting in Fischingen on QCs organized by EQuIP                                    | Focus group              | 24/04/2015<br>Fischingen | 90'            |
| Group of 12 GPs at the open meeting in Fischingen on QCs organized by EQuIP                                    | Focus group              | 25/04/2015<br>Fischingen | 90'            |
| Executive for General Practice at a central hospital                                                           | Interview                | 08/05/2015<br>Aarau      | 37'17''        |
