# Supplementary material for: Understanding how and why quality circles improve standards of practice, enhance professional development and increase psychological well-being of general practitioners: a realist synthesis
Source: PubMed Central journal article supplement — BMJ Open. 2022 May 3;12(5):e058453. doi: 10.1136/bmjopen-2021-058453 (PMC9073411; doi:10.1136/bmjopen-2021-058453), 2022-05-03
Supplement: bmjopen-2021-058453supp007.pdf [file bmjopen-2021-058453supp007.pdf]

## Supplemental material 7 Study characteristics

| Author year                            | Country | Study design                        | Setting       | Participants, professional background                                       | Study duration                                                 | Objective and intervention setting                                                                                                                            | Facilitation and group dynamics                                                                                                 | Didactic and QI technique                                                                                                                                                   | Outcome oriented data                                                                                                                     | Common characteristics of the cluster (kinship)                                                                                             |
|----------------------------------------|---------|-------------------------------------|---------------|-----------------------------------------------------------------------------|----------------------------------------------------------------|---------------------------------------------------------------------------------------------------------------------------------------------------------------|---------------------------------------------------------------------------------------------------------------------------------|-----------------------------------------------------------------------------------------------------------------------------------------------------------------------------|-------------------------------------------------------------------------------------------------------------------------------------------|---------------------------------------------------------------------------------------------------------------------------------------------|
| <b>Norwegian papers on peer groups</b> |         |                                     |               |                                                                             |                                                                |                                                                                                                                                               |                                                                                                                                 |                                                                                                                                                                             |                                                                                                                                           |                                                                                                                                             |
| Gjelstad 2006 <sup>1</sup>             | Norway  | Study protocol                      | PHC           | 80 CME groups; 7–8 GPs in each group located in the southern part of Norway | 6 months: meetings once a month; the study covered 3 meetings. | Reduce prescription of antibiotics for upper respiratory tract infections and prescription of inappropriate drugs for elderly. Pre-existing CME groups.       | Trained tutor serving 3 CME groups, reflection on own prescription strategies, disclosure of areas for individual improvement.  | Discussions, reflective thinking on individual prescription data, one-day introductory workshop, audit and feedback, group educational outreach visits, academic detailing. | After one year, improvement of prescription patterns was expected.                                                                        | Norwegian QC studies on improving drug prescriptions, accompanied by a qualitative study. Brekke provided the baseline study for the trial. |
| Gjelstad 2013 <sup>2</sup>             | Norway  | Cluster randomised controlled trial | PHC           | 80 CME groups; 7–8 GPs in each group located in the southern part of Norway | 6 months: meetings once a month; the study covered 3 meetings. | As in Gjelstad 2006<br>Each group acted as blind control for the other groups (Rognstad 2013).                                                                | As in Gjelstad 2006                                                                                                             | Authors consider the key element in the study to be 'what happens to a general practitioner's prescribing behaviour when they reflect on their prescriptions'.              | After one year, reduction of prescription rate of antibiotics and increase of prescription rate of penicillin compared to control groups. |                                                                                                                                             |
| Straand 2006 <sup>3</sup>              | Norway  | Study protocol                      | Norwegian PHC | 80 CME groups; 7–8 GPs in each group located in the southern part of Norway | 6 months: meetings once a month; the study covered 3 meetings. | Reduce prescription of inappropriate drugs for elderly people and prescription of antibiotics in upper respiratory tract infections. Pre-existing CME groups. | Trained tutor serving 3 CME groups, reflection on own prescription strategies, disclosure of areas for individual improvements. | As in Gjelstad 2006                                                                                                                                                         | After one year: reduction of inappropriate prescription patterns to elderly out-patients $\geq 70$ years.                                 |                                                                                                                                             |

## Supplemental material 7 Study characteristics

| Author year                        | Country         | Study design                                                     | Setting | Participants, professional background                                                                    | Study duration                                                 | Objective and intervention setting                                                               | Facilitation and group dynamics                                                                                                                       | Didactic and QI technique                                                                                                      | Outcome oriented data                                                                                                                              | Common characteristics of the cluster (kinship)                                                                                             |
|------------------------------------|-----------------|------------------------------------------------------------------|---------|----------------------------------------------------------------------------------------------------------|----------------------------------------------------------------|--------------------------------------------------------------------------------------------------|-------------------------------------------------------------------------------------------------------------------------------------------------------|--------------------------------------------------------------------------------------------------------------------------------|----------------------------------------------------------------------------------------------------------------------------------------------------|---------------------------------------------------------------------------------------------------------------------------------------------|
| Brekke 2008 <sup>4</sup>           | Norway          | Cross-sectional study                                            | PHC     | 454 GPs in 80 CME groups, 85,836 patients                                                                | 6 months                                                       | Baseline data of ongoing CME groups for one year                                                 | Ongoing CME groups without intervention                                                                                                               | Ongoing CME groups                                                                                                             | After 1 year: 18.4% of the patients received at least one inappropriate prescription.                                                              | Norwegian QC studies on improving drug prescriptions, accompanied by a qualitative study. Brekke provided the baseline study for the trial. |
| Rognstad 2013 <sup>5</sup>         | Norway          | Cluster randomised controlled trial                              | PHC     | 80 CME groups; 7–8 GPs in each group located in the southern part of Norway                              | 6 months: meetings once a month; the study covered 3 meetings. | As in Straand 2006<br>Each group acted as blind control for the other groups (Gjelstad 2013).    | Training in drug treatment of elderly people, the rationale for the 13 listed inappropriate drugs, how to facilitate learning within a group setting. | Audit and feedback, tailored feedback, tailored academic detailing, discussions of own prescribing pattern.                    | After one year, reduction of inappropriate prescriptions for elderly people. Potentially more harmful combinations were more likely to be reduced. |                                                                                                                                             |
| Frich 2010 <sup>6</sup>            | Norway          | Qualitative study to explore experiences with academic detailing | PHC     | 39 GPs and 20 tutors who were also GPs, 9 focus groups                                                   | 6 months: meetings once a month; the study covered 3 meetings. | Qualitative analysis of the RCTs, focusing on three meetings with the CME groups.                | Groups have their own cultures; tutors perceived themselves as members of the group.                                                                  | Consensus discussions, audit and feedback, academic detailing, discussions of their own cases.                                 | Reflective thinking increased; inappropriate results upset some GPs.                                                                               |                                                                                                                                             |
| <b>Dutch papers on peer groups</b> |                 |                                                                  |         |                                                                                                          |                                                                |                                                                                                  |                                                                                                                                                       |                                                                                                                                |                                                                                                                                                    |                                                                                                                                             |
| Geboers 1999 <sup>7</sup>          | The Netherlands | Case series                                                      | PHC     | All staff of 20 general practices (each working as a group) tested the model over a period of 18 months. | 18 months. Monthly quality meetings.                           | Evaluate the feasibility of a model for continuous quality improvement (CQI) in small practices. | Trained facilitators: practice assistants with managerial experience. Involving all staff at regular meetings.                                        | Course on CQI: choose topic, observe practice, compare performance with targets, implement change, plan care and repeat cycle. | After 18 months, this model seemed feasible to the authors.                                                                                        | Dutch QC studies of a continuous quality improvement model.                                                                                 |

## Supplemental material 7 Study characteristics

| Author year               | Country         | Study design                                                  | Setting               | Participants, professional background                                                          | Study duration                                                     | Objective and intervention setting                                                                              | Facilitation and group dynamics                                                                                    | Didactic and QI technique                                                                                                           | Outcome oriented data                                                                                                                         | Common characteristics of the cluster (kinship)             |
|---------------------------|-----------------|---------------------------------------------------------------|-----------------------|------------------------------------------------------------------------------------------------|--------------------------------------------------------------------|-----------------------------------------------------------------------------------------------------------------|--------------------------------------------------------------------------------------------------------------------|-------------------------------------------------------------------------------------------------------------------------------------|-----------------------------------------------------------------------------------------------------------------------------------------------|-------------------------------------------------------------|
| Geboers 2001 <sup>8</sup> | The Netherlands | Mixed methods: before-and-after study and qualitative inquiry | PHC                   | 20 practices (each working as a group): 53 physicians and 57 medical practice assistants       | 18 months. Monthly quality meetings.                               | Measure the attitude towards CQI model in small practices before and after study.                               | As in Geboer, 1999                                                                                                 | Feedback on practice assessment, introductory meeting, support for adoption of the model.                                           | After 18 months, participants experienced perceived success and were willing to continue.                                                     | Dutch QC studies of a continuous quality improvement model. |
| Engels 2003 <sup>9</sup>  | The Netherlands | Controlled before-and-after study                             | Mid-wives, mainly PHC | 255 midwives in 28 groups                                                                      | Study period 1998 to 2000                                          | Measure CQI effect on clinical practice of midwives in PHC in a before-and-after study.                         | Three-day training of facilitators. Peer groups of midwives in the same geographical area. Regular group meetings. | Allocated topics with no choice, using the CQI model.                                                                               | Positive effect on change of clinical practice was noted. Technical skills could not be improved.                                             |                                                             |
| Engels 2006 <sup>10</sup> | The Netherlands | Randomised controlled trial                                   | PHC                   | 26 sites in the intervention and 23 sites as controls. Size and composition of groups unknown. | December 2001 - February 2004; inclusion October 2001 - April 2003 | Examine the effects of a team-based model for CQI on primary-care practice management in small-scale practices. | Medical practice assistants as facilitators after 3 days' training.                                                | Visitation Instrument for Practice (VIP) provided topics, CQI model with detailed oral and written feedback, monthly team meetings. | Evaluation after one year showed an increased number of CQI projects compared to control group, but the study was statistically underpowered. |                                                             |

## Supplemental material 7 Study characteristics

| Author year                   | Country         | Study design                             | Setting | Participants, professional background                                                    | Study duration                                           | Objective and intervention setting                                                                                                                     | Facilitation and group dynamics                                                                     | Didactic and QI technique                                                                                                        | Outcome oriented data                                                                  | Common characteristics of the cluster (kinship) |
|-------------------------------|-----------------|------------------------------------------|---------|------------------------------------------------------------------------------------------|----------------------------------------------------------|--------------------------------------------------------------------------------------------------------------------------------------------------------|-----------------------------------------------------------------------------------------------------|----------------------------------------------------------------------------------------------------------------------------------|----------------------------------------------------------------------------------------|-------------------------------------------------|
| Verstappen 2003 <sup>11</sup> | The Netherlands | Multicentre, randomised controlled trial | PHC     | 26 QCs consisting of 174 GPs.                                                            | 6 months baseline followed by 6 months' intervention.    | Determine the effects of a multifaceted strategy aimed at improving test ordering patterns in existing QCs.                                            | Discussion and comparison of feedback reports among colleagues, communication course.               | 3 consecutive, personal-feedback reports, comparison of results with guidelines, plans for change, discussion of Bayesian rules. | Modest improvement in test ordering when comparing the two intervention groups         | Dutch QCs on improving test ordering            |
| Verstappen 2004 <sup>12</sup> | The Netherlands | Cluster randomised controlled trial      | PHC     | 27 QCs consisting of 194 GPs.                                                            | 6 months of baseline followed by 6 months' intervention. | A multifaceted strategy aimed at improving test-ordering patterns in pre-existing QCs; 13 QCs followed a new strategy while 14 only received feedback. | Discussion and comparison of feedback reports among colleagues, communication training, 3 meetings. | As in Verstappen 2003                                                                                                            | Compared to feedback, the tailored intervention decreased test ordering significantly. |                                                 |
| Verstappen 2004 <sup>13</sup> | The Netherlands | Cluster randomised trial                 | PHC     | 27 QCs consisting of 194 GPs. 13 QCs used a new strategy while 14 only received feedback | 6 months of baseline followed by 6 months' intervention. | Determine the effects of a multifaceted strategy in pre-existing QCs aimed at improving test ordering patterns. 3 meetings took place.                 | Discussion and comparison of feedback reports among colleagues, communication course.               | As in Verstappen 2003                                                                                                            | Mean costs were reduced by cutting unnecessary tests.                                  |                                                 |
| Verstappen 2004 <sup>14</sup> | The Netherlands | Cluster randomised trial; surveys        | PHC     | 27 QCs consisting of 194 GPs. Mean group size was 7.4                                    | 6 months of baseline followed by 6 months'               | A process evaluation of a multifaceted strategy in pre-existing QCs aimed at                                                                           | Discussion and comparison of feedback reports among colleagues using feedback in pairs,             | As in Verstappen 2003                                                                                                            | Individual plans for change and group plan changes were made with a high level of      |                                                 |

## Supplemental material 7 Study characteristics

| Author year               | Country         | Study design                                                       | Setting | Participants, professional background                                                                                            | Study duration                                                     | Objective and intervention setting                                                                                                                                                    | Facilitation and group dynamics                                                                                                                      | Didactic and QI technique                                                                                                                                                                      | Outcome oriented data                                                                                                                         | Common characteristics of the cluster (kinship) |
|---------------------------|-----------------|--------------------------------------------------------------------|---------|----------------------------------------------------------------------------------------------------------------------------------|--------------------------------------------------------------------|---------------------------------------------------------------------------------------------------------------------------------------------------------------------------------------|------------------------------------------------------------------------------------------------------------------------------------------------------|------------------------------------------------------------------------------------------------------------------------------------------------------------------------------------------------|-----------------------------------------------------------------------------------------------------------------------------------------------|-------------------------------------------------|
|                           |                 |                                                                    |         |                                                                                                                                  | inter-vention.                                                     | improving test ordering patterns.                                                                                                                                                     | communication course.                                                                                                                                |                                                                                                                                                                                                | satisfaction.                                                                                                                                 |                                                 |
| Smeele 1999 <sup>15</sup> | The Netherlands | Randomised controlled trial                                        | PHC     | 2 QCs, 17 GPs in each group                                                                                                      | Pre-measurement and post-measurement after one year.               | Evaluate the effects of a QC programme on guideline adherence. 4 sessions for GPs and 1 session for medical practice assistants.                                                      | The group education was conducted in two small groups with 9 and 8 GPs respectively. Facilitator was a GP. Not all GPs participated in all sessions. | Lectures, role-play, skills training, peer review of performance, group consensus discussions and problem-solving of hypothetical situations involving patients.                               | No significant changes were found for care provided and patient outcomes compared with the control group.                                     | Dutch QC studies on guideline adherence.        |
| Kasje 2006 <sup>16</sup>  | The Netherlands | Cluster randomised trial using a balanced incomplete block design. | PHC     | 10 peer review groups (97 GPs): chronic heart failure. 6 peer review groups (46 GPs): hypertension and diabetes mellitus type 2. | One educational meeting followed by data collection after 6 months | Evaluate the effects of a QC programme on guideline adherence in pre-existing groups. One group received a programme on chronic heart failure, the other on diabetes mellitus type 2. | Facilitators adhered to a specific process.                                                                                                          | One meeting: consensus about guideline statements, evaluation of current management of five of their own patients, listing barriers and possible solutions, formulation of personal intentions | No effect was shown. High dropout rate especially in the group dealing with diabetic patients. The programme was not implemented as intended. |                                                 |

## Supplemental material 7 Study characteristics

| Author year                                                                       | Country         | Study design                                                                                        | Setting                          | Participants, professional background                                                                                                        | Study duration                               | Objective and intervention setting                                                                                                                                                    | Facilitation and group dynamics                                                                                               | Didactic and QI technique                                                                                                                                              | Outcome oriented data                                                                                                                                         | Common characteristics of the cluster (kinship)                                  |
|-----------------------------------------------------------------------------------|-----------------|-----------------------------------------------------------------------------------------------------|----------------------------------|----------------------------------------------------------------------------------------------------------------------------------------------|----------------------------------------------|---------------------------------------------------------------------------------------------------------------------------------------------------------------------------------------|-------------------------------------------------------------------------------------------------------------------------------|------------------------------------------------------------------------------------------------------------------------------------------------------------------------|---------------------------------------------------------------------------------------------------------------------------------------------------------------|----------------------------------------------------------------------------------|
| Van Eijk 2001 <sup>17</sup>                                                       | The Netherlands | Randomised controlled trial with three parts: individual visits, group visits, and a control group. | GPs and pharmacists in PHC       | Individual approach: 70 GPs and 14 pharmacists; Group approach: 52 GPs and 9 pharmacists in five QCs; Control: 68 GPs and their pharmacists. | 12 months                                    | Comparison of individual educational visits versus group visits to improve inappropriate prescriptions for elderly people. Pre-existing groups of GPs. 3 visits at 4-month intervals. | There was no description about the process that took place in the groups or at the individual level.                          | First visit: guidelines about appropriate prescription of drugs for elderly. Second visit: personal prescription habits were highlighted. Third visit: short follow up | The individual and the group approach led to a reduction in the rate of starting inappropriate drugs and to an increase of prescription of appropriate drugs. | Dutch QC studies on improving drug prescriptions involving pharmacists.          |
| Wel-schen 2004 <sup>18</sup>                                                      | The Netherlands | Randomised controlled trial.                                                                        | GPs and pharmacists in Dutch PHC | 12 peer review groups including 100 GPs with their collaborating pharmacists.                                                                | Approx. 6 months. Evaluation after 9 months. | Reduce prescription of antibiotics to patients with upper respiratory tract infections in pre-existing groups.                                                                        | Group education with consensus procedure. One meeting followed by individual feedback after 2 weeks and 6 months.             | Group education meeting about guidelines, communication skills training, patient leaflets. After 2 weeks and 6 months, individualised feedback.                        | Prescription rate for antibiotics was reduced after 9 months. After 15 months, the effect was lasting. Satisfaction among patients remained high.             | Dutch QC studies on improving drug prescriptions involving pharmacists.          |
| <b>Problem Based Small Group Learning (PBSGL) in Canada, Scotland and England</b> |                 |                                                                                                     |                                  |                                                                                                                                              |                                              |                                                                                                                                                                                       |                                                                                                                               |                                                                                                                                                                        |                                                                                                                                                               |                                                                                  |
| Davis 1999 <sup>19</sup>                                                          | Canada          | Case series                                                                                         | PHC                              | 54 GPs in 4 newly formed groups.                                                                                                             | A 2.5-hour workshop                          | Develop and evaluate a CME programme on osteoporosis for PHC. 54 family physicians participated in 1 of 4 pilot PBSG learning sessions.                                               | GP trained as a facilitator. The facilitator elicited interactive responses using specific predetermined prompting questions. | Practice-based case scenarios to increase awareness of risk factors for osteoporosis.                                                                                  | Participants' satisfaction was high. Participants increased their knowledge scores (not significant because of size of the study).                            | Papers about Practice Based Small Group Learning in Canada, Scotland and England |

## Supplemental material 7 Study characteristics

| Author year                  | Country | Study design                         | Setting | Participants, professional background                                    | Study duration                                          | Objective and intervention setting                                                                                                                                                                                         | Facilitation and group dynamics                                                                                                                                                            | Didactic and QI technique                                                                                                                                                                                                              | Outcome oriented data                                                                                                                                                                                                              | Common characteristics of the cluster (kinship)                                  |
|------------------------------|---------|--------------------------------------|---------|--------------------------------------------------------------------------|---------------------------------------------------------|----------------------------------------------------------------------------------------------------------------------------------------------------------------------------------------------------------------------------|--------------------------------------------------------------------------------------------------------------------------------------------------------------------------------------------|----------------------------------------------------------------------------------------------------------------------------------------------------------------------------------------------------------------------------------------|------------------------------------------------------------------------------------------------------------------------------------------------------------------------------------------------------------------------------------|----------------------------------------------------------------------------------|
| Mc Sherry 2000 <sup>20</sup> | Canada  | Before-and-after study               | PHC     | 544 GPs in 75 workshops with a mean of 7 GPs in each newly formed group. | A 2-hour workshop with questionnaires before and after. | Pilot study to introduce PBSGL groups in PHC. Topic: a patient-centred approach to managing benign prostate problems and evaluate 'intent to change'.                                                                      | Initial needs assessment, problem-based educational materials, opportunities for participants to develop implementation strategies through discussion with peers.                          | Educational video case studies illustrating various presentations of prostatism, a handbook with detailed information on the case studies. A toll-free telephone line was provided for scientific and technical support.               | Practice behaviours were improved, especially those linked to a patient-centred approach not commonly practised before the workshops.                                                                                              | Papers about Practice Based Small Group Learning in Canada, Scotland and England |
| Peloso 2000 <sup>21</sup>    | Canada  | Qualitative inquiry over three years | PHC     | 12–15 GPs, a facilitator and sometimes an expert.                        | 3 years                                                 | Discuss a 3-year experience with the small-group format, comprising more than 25 sessions as either learners or facilitators. Facilitators have 20 hours of training. Monthly meetings, each session takes 1.5 to 2 hours. | Sessions took place in the evenings with a meal in a relaxed atmosphere. The group chose their topics. Presentation of own clinical cases. Experts did not lecture but answered questions. | Learner-directed agenda of topics, information from trusted peers, opportunity for feedback. Information from several sources – printed materials, peer discussion, patient questions – the perception of need for change is enhanced. | GPs can discuss topics relevant to day-to-day practice and obtain access to local experts. They compare their practice with that of others. The group and the interactive format are fun. Experts are comfortable with the format. |                                                                                  |

## Supplemental material 7 Study characteristics

| Author year                 | Country  | Study design                   | Setting | Participants, professional background | Study duration                                                           | Objective and intervention setting                                                                                                                                       | Facilitation and group dynamics                                                                                                                                               | Didactic and QI technique                                                                                                                                                  | Outcome oriented data                                                                                                                 | Common characteristics of the cluster (kinship)                                  |
|-----------------------------|----------|--------------------------------|---------|---------------------------------------|--------------------------------------------------------------------------|--------------------------------------------------------------------------------------------------------------------------------------------------------------------------|-------------------------------------------------------------------------------------------------------------------------------------------------------------------------------|----------------------------------------------------------------------------------------------------------------------------------------------------------------------------|---------------------------------------------------------------------------------------------------------------------------------------|----------------------------------------------------------------------------------|
| Herbert 2004 <sup>22</sup>  | Canada   | Randomised controlled trial    | PHC     | 200 GPs in 28 pre-existing groups.    | 6 months, comparison of data 6 months before and after the intervention. | Assess the impacts of individualised prescribing feedback. 4 groups: control, prescribing portrait only, educational module only, both portrait and educational module.  | 3 representative patient cases were discussed, evidence-based information to guide management. Facilitation 'as usual' in the CME group.                                      | Histograms comparing an individual's prescribing rates with those of the group and of all GPs in the study. A succinct evidence-based message to guide future prescribing. | The group that received both the module and the portrait had the greatest increase in preferred prescriptions.                        | Papers about Practice Based Small Group Learning in Canada, Scotland and England |
| Mc Vicar 2006 <sup>23</sup> | Scotland | Before-and-after study (pilot) | PHC     | 5 small groups, 7–9 GPs in each group | 12 months                                                                | Assess effectiveness of the PBSG approach in developing participants' knowledge, skills and attitudes in interpreting, discussing and applying current medical evidence. | Facilitators establish and maintain a learning environment. They create a culture of openness, honesty and willingness to acknowledge unawareness as a precursor to learning. | Educational material, a tool that triggers reflection, discussion of personal experiences and acknowledge-ment of gaps between current and best practice.                  | The study was statistically underpowered. Participants highlighted general enjoyment, professional reassurance and personal learning. |                                                                                  |



## Supplemental material 7 Study characteristics

| Author year               | Country  | Study design                                  | Setting | Participants, professional background                                        | Study duration                                           | Objective and intervention setting                                                                                                                                                      | Facilitation and group dynamics                                                                                                                                                                   | Didactic and QI technique                                                                                                                                                                                                               | Outcome oriented data                                                                                                                                                                 | Common characteristics of the cluster (kinship)                                  |
|---------------------------|----------|-----------------------------------------------|---------|------------------------------------------------------------------------------|----------------------------------------------------------|-----------------------------------------------------------------------------------------------------------------------------------------------------------------------------------------|---------------------------------------------------------------------------------------------------------------------------------------------------------------------------------------------------|-----------------------------------------------------------------------------------------------------------------------------------------------------------------------------------------------------------------------------------------|---------------------------------------------------------------------------------------------------------------------------------------------------------------------------------------|----------------------------------------------------------------------------------|
| Armson 2007 <sup>24</sup> | Canada   | Description of the programme                  | PHC     | 4–10 GPs                                                                     | Meeting of around 90 minutes once or twice a month       | Identify gaps between current practice and best available evidence, to encourage reflection on individual practice, and promote changes in patient care, using an educational approach. | The facilitator's tasks are to focus discussion, to encourage the group to identify barriers to the implementation of new knowledge and to establish a safe, supportive environment for learning. | Facilitation of discussions based on educational material and a tool (log sheet) that triggers reflection. The group starts with personal experiences and reflects on and acknowledges gaps between current practice and best practice. | Groups of various compositions function effectively in this particular small group environment. If the facilitator lost the group's interest, disintegration of the group was likely. | Papers about Practice Based Small Group Learning in Canada, Scotland and England |
| Kelly 2007 <sup>25</sup>  | Scotland | Qualitative study: semi-structured interviews | PHC     | One-to-one interview to evaluate the process in 5 small pre-existing groups. | Interviews among participants of the Mc Vicar 2006 study | Explore the perceptions and experiences of PBSG participants to gain an understanding of how PBSGL works.                                                                               | Facilitator opens discussions, clarifies statements, summarises what was said and questions issues, creating a learning environment.                                                              | Case discussions make evidence-based material relevant to participants and stimulate reflection. Mutual learning is important. Discussing data with others stimulates reflection.                                                       | Participants joined PBSGL groups because of the need to update medical knowledge, to compare personal practice with peer practice.                                                    |                                                                                  |

## Supplemental material 7 Study characteristics

| Author year                   | Country  | Study design                                                              | Setting | Participants, professional background   | Study duration                                | Objective and intervention setting                                                                                                            | Facilitation and group dynamics                                                                                                                                      | Didactic and QI technique                                                                                                                                                          | Outcome oriented data                                                                                                                                                    | Common characteristics of the cluster (kinship)                                  |
|-------------------------------|----------|---------------------------------------------------------------------------|---------|-----------------------------------------|-----------------------------------------------|-----------------------------------------------------------------------------------------------------------------------------------------------|----------------------------------------------------------------------------------------------------------------------------------------------------------------------|------------------------------------------------------------------------------------------------------------------------------------------------------------------------------------|--------------------------------------------------------------------------------------------------------------------------------------------------------------------------|----------------------------------------------------------------------------------|
| Overton 2009 <sup>26</sup>    | Scotland | Qualitative approach: theory-driven framework developed by Chen and Rossi | PHC     | 19 GPs and practice nurses              | Interviews among participants of PBSGL groups | Study the experiences of GPs and practice nurses in PBSGL. Data sources: logbooks, e-mail, telephone conversations and one-to-one interviews. | Qualitative study of the process in PBSGL groups: Group cohesion grew and mutual emotional support increased. With increasing trust, open discussions were possible. | Qualitative study of the process in PBSGL groups: case discussions kept people going and different perspectives could be considered. Self-esteem increased, as did mutual respect. | Motivation for joining the groups: preferred learning style, keeping up to date, learning in multi-professional groups, group atmosphere. and increased self-esteem.     | Papers about Practice Based Small Group Learning in Canada, Scotland and England |
| Cunningham 2011 <sup>27</sup> | Scotland | Qualitative study: focus group                                            | PHC     | Two focus groups of PBSGL facilitators. | Focus groups                                  | Learn about motivators to become a facilitator in PBSGL groups.                                                                               | Qualitative study of the process in PBSGL groups                                                                                                                     | Qualitative study of the process in PBSGL groups                                                                                                                                   | Motivators to become a facilitator were positive past experience of group learning, the chance of career advancement. Support for facilitators after initial training.t. |                                                                                  |

## Supplemental material 7 Study characteristics

| Author year                  | Country | Study design                   | Setting            | Participants, professional background                       | Study duration             | Objective and intervention setting                                                                                                                                      | Facilitation and group dynamics                                                                         | Didactic and QI technique                                                                                                                                                                                      | Outcome oriented data                                                                                                                                                                                    | Common characteristics of the cluster (kinship)                                      |
|------------------------------|---------|--------------------------------|--------------------|-------------------------------------------------------------|----------------------------|-------------------------------------------------------------------------------------------------------------------------------------------------------------------------|---------------------------------------------------------------------------------------------------------|----------------------------------------------------------------------------------------------------------------------------------------------------------------------------------------------------------------|----------------------------------------------------------------------------------------------------------------------------------------------------------------------------------------------------------|--------------------------------------------------------------------------------------|
| Rial 2013 <sup>28</sup>      | England | Before-and-after study         | Trainee GPs in PHC | 2 newly-founded groups of seven future GPs.                 | After 8 months, 4 meetings | Identify whether they were supported in making the transition from trainee to independent practitioner through attending PBSGL groups.                                  | One group member was trained as a facilitator.                                                          | Canadian PBSGL approach was used                                                                                                                                                                               | Improved ability to identify and use evidence in practice, shifting the focus from postgraduate exams towards 'real world' practice. The PBSGL groups still meet.                                        |                                                                                      |
| <b>QCs in Canada</b>         |         |                                |                    |                                                             |                            |                                                                                                                                                                         |                                                                                                         |                                                                                                                                                                                                                |                                                                                                                                                                                                          |                                                                                      |
| Ioannidis 2007 <sup>29</sup> | Canada  | Before-and-after study (pilot) | PHC                | 5 QCs, 52 physicians, GPs and some osteoporosis specialists | 12 months                  | Assess whether use of QCs could improve family physicians' adherence to osteoporosis guidelines. 3 training meetings for the facilitators, 3 meetings for participants. | QC facilitators were local family physicians recruited and trained specifically to lead study meetings. | Educational material, interactive group meetings, use of local opinion leaders, audit and feedback, reminders, multi-professional collaboration, financial incentives and information distributed to patients. | The intervention seemed to be feasible and was well received among GPs. 84% agreed that the feedback helped them understand their current practice patterns and decide on areas that needed improvement. | Papers on guideline adherence using continuous quality improvement cycles in Canada. |

## Supplemental material 7 Study characteristics

| Author year                  | Country | Study design           | Setting | Participants, professional background                      | Study duration | Objective and intervention setting                                                              | Facilitation and group dynamics                                                                                                | Didactic and QI technique                                                                                                                                                                                                      | Outcome oriented data                                                                                                             | Common characteristics of the cluster (kinship)                                     |
|------------------------------|---------|------------------------|---------|------------------------------------------------------------|----------------|-------------------------------------------------------------------------------------------------|--------------------------------------------------------------------------------------------------------------------------------|--------------------------------------------------------------------------------------------------------------------------------------------------------------------------------------------------------------------------------|-----------------------------------------------------------------------------------------------------------------------------------|-------------------------------------------------------------------------------------|
| Ioannidis 2008 <sup>30</sup> | Canada  | Before-and-after study | PHC     | 340 participants (GPs) in 34 QCs and local opinion leaders | 1 year         | Increase guideline adherence concerning osteoporosis. 5 meetings (60–90 minutes) for two years. | 5 educational meetings                                                                                                         | As in Ioannidis 2007                                                                                                                                                                                                           | Physicians' awareness of osteoporosis risk factors and appropriate bone mineral density testing increased.                        | Papers on guideline adherence using continuous quality improvement cycles in Canada |
| Ioannidis 2009 <sup>31</sup> | Canada  | Before-and-after study | PHC     | As in Ioannidis 2008                                       | 2 years        | As in Ioannidis 2008                                                                            | As in Ioannidis 2008                                                                                                           | As in Ioannidis 2008                                                                                                                                                                                                           | Guideline adherence increased                                                                                                     |                                                                                     |
| <b>German QCs</b>            |         |                        |         |                                                            |                |                                                                                                 |                                                                                                                                |                                                                                                                                                                                                                                |                                                                                                                                   |                                                                                     |
| Szece-sny 1994 <sup>32</sup> | Germany | Before-and-after study | PHC     | 10 GPs                                                     | 2 years        | Observation of the initialisation and establishment of a QC. Monthly meetings.                  | Presentation round, discussion of possible topics, choice of a topic impacting all participants; a GP facilitates the process. | Setting priorities, analysing the situation, developing criteria for improving quality, analysis of present practice, general priorities for necessary changes, comparison with evidence-based literature, change of practice. | GPs are interested in everyday practice-related topics. The gap between existing knowledge and clinical practice is acknowledged. | Papers about establishing QCs in Germany: pilot stage.                              |

## Supplemental material 7 Study characteristics

| Author year                 | Country | Study design                      | Setting | Participants, professional background                 | Study duration                        | Objective and intervention setting                                                                            | Facilitation and group dynamics                                                                                                  | Didactic and QI technique                                                                                                                                                            | Outcome oriented data                                                                                                                     | Common characteristics of the cluster (kinship)        |
|-----------------------------|---------|-----------------------------------|---------|-------------------------------------------------------|---------------------------------------|---------------------------------------------------------------------------------------------------------------|----------------------------------------------------------------------------------------------------------------------------------|--------------------------------------------------------------------------------------------------------------------------------------------------------------------------------------|-------------------------------------------------------------------------------------------------------------------------------------------|--------------------------------------------------------|
| Gerlach 1995 <sup>33</sup>  | Germany | Survey among 138 QC participants  | PHC     | 138 GPs taking part in QCs, 8–12 GPs in each one.     | Not applicable                        | Evaluation of case-based QC process focussing on a topic.                                                     | GPs use their own medical records, patient data or video recordings as a basis for problem-based learning. Facilitation by a GP. | Case-based discussions may indicate a need to change everyday practice. Evidence-based material and/or local opinion leaders may contribute to the discussion and consensus finding. | 79% of the GPs thought that cases from daily practice should be the starting point of QCs. The process led to locally adapted guidelines. | Papers about establishing QCs in Germany: pilot stage. |
| Hartmann 1995 <sup>34</sup> | Germany | Controlled before-and-after study | PHC     | 2 QCs, 10 GPs in each group compared to control group | 4 months. Evaluation after 5 meetings | Increase guideline adherence in diabetic care. Test training modules for facilitators (GPs).                  | 2 GPs in each group received training in facilitating small groups.                                                              | Didactic techniques as in Gerlach 1995, role play to practise patient–doctor communication.                                                                                          | Guideline adherence improved compared to control group.                                                                                   |                                                        |
| Murad 1998 <sup>35</sup>    | Germany | Before-and-after study            | PHC     | 1 QC including 10 GPs                                 | 12 months                             | Improve guideline adherence for patients with diabetes mellitus type 2. 23 existing QCs meeting once a month. | GPs use their own medical records, patient data or video recordings as a basis for problem-based learning. Facilitation by a GP. | Use of practice data, medical records and case discussions involving a local opinion leader.                                                                                         | According to QC documents, improved guideline adherence.                                                                                  |                                                        |
| Tausch 1995 <sup>36</sup>   | Germany | Before-and-after study (protocol) | PHC     | 23 QCs, 10 GPs in each group                          | Evaluation over 18 months             | Evaluate facilitators' manuals on different common diseases. 23 existing QCs met                              | The facilitators prompted and encouraged participants to identify common problems in their                                       | The manual may provide a starting point for developing consensus guidelines.                                                                                                         | Evaluation on three levels: reasons for participation in QCs, usability of the manual,                                                    |                                                        |

## Supplemental material 7 Study characteristics

| Author year               | Country        | Study design                      | Setting | Participants, professional background                                                    | Study duration                             | Objective and intervention setting                                                                                                                        | Facilitation and group dynamics                                                                                       | Didactic and QI technique                                                                                                                                            | Outcome oriented data                                                                                                     | Common characteristics of the cluster (kinship)         |
|---------------------------|----------------|-----------------------------------|---------|------------------------------------------------------------------------------------------|--------------------------------------------|-----------------------------------------------------------------------------------------------------------------------------------------------------------|-----------------------------------------------------------------------------------------------------------------------|----------------------------------------------------------------------------------------------------------------------------------------------------------------------|---------------------------------------------------------------------------------------------------------------------------|---------------------------------------------------------|
|                           |                |                                   |         |                                                                                          |                                            | once a month.                                                                                                                                             | practice.                                                                                                             |                                                                                                                                                                      | assessing behaviour change.                                                                                               |                                                         |
| Tausch 1996 <sup>37</sup> | Germany        | Survey                            | PHC     | 25 QCs, 246 GPs                                                                          | Evaluation after 12 months and 10 meetings | Capture the objectives of the participants. 25 pre-existing QCs met once a month.                                                                         | As above                                                                                                              | Case vignettes, discussion of adequate diagnostic and therapeutic procedures in relation to evidence-based material.                                                 | Reasons for participating in QCs: exchange among colleagues, improved self-confidence.                                    | Papers about establishing QCs in Germany using manuals. |
| Tausch 2001 <sup>38</sup> | Germany        | Before-and-after study            | PHC     | 23 QCs, 243 GPs                                                                          | Evaluation after 18 months                 | Evaluate reasons for participation, usability of manuals and assessment of behaviour change (self-reported improvement). To expand QCs within short time. | Voluntary participation in monthly meetings, 6–12 GPs in each group, trained facilitator.                             | Moderator-manuals that allow self-evaluation provide information about appropriate diagnostic and therapeutic recommendations for common diseases.                   | Reasons for participating: exchange of experiences among colleagues, increased competence and high level of satisfaction. |                                                         |
| Andres 1997 <sup>39</sup> | Germany/Hessen | Controlled before-and-after study | PHC     | 32 GPs were grouped into 3 QCs promoted by the association of statutory health insurance | 12 months                                  | Evaluate the process in the groups after 10 meetings. Participating GPs exceeded average prescription costs.                                              | Participants felt forced to join QCs to change their behaviour. They had to overcome the feeling of being controlled. | Case discussions, audit charts to analyse prescription habits, interactive learning, reflective thinking and consensus finding as to rational prescription practice. | 66% reported change in behaviour. 22 of 27 wanted to continue with QCs.                                                   |                                                         |

## Supplemental material 7 Study characteristics

| Author year                | Country                    | Study design                      | Setting | Participants, professional background                                                     | Study duration           | Objective and intervention setting                                                                                                                                                          | Facilitation and group dynamics                                                                                      | Didactic and QI technique                                                                                                                                                    | Outcome oriented data                                                                                                                                              | Common characteristics of the cluster (kinship)                                                            |
|----------------------------|----------------------------|-----------------------------------|---------|-------------------------------------------------------------------------------------------|--------------------------|---------------------------------------------------------------------------------------------------------------------------------------------------------------------------------------------|----------------------------------------------------------------------------------------------------------------------|------------------------------------------------------------------------------------------------------------------------------------------------------------------------------|--------------------------------------------------------------------------------------------------------------------------------------------------------------------|------------------------------------------------------------------------------------------------------------|
| Andres 2004 <sup>40</sup>  | Germany/<br>Lower Saxony   | Survey among 797 QC participants  | PHC     | 648 out of 797 participants answered the survey                                           | Evaluation after 1 year  | Evaluate QC participants' experiences in QCs intended to improve prescription patterns.                                                                                                     | 7–10 GPs, monthly meetings, facilitator guiding through the process, support by academic staff members if necessary. | Case discussions, peer-led academic detailing allowing comparison with colleagues, reflective thinking, consensus discussions, evidence-based material, patient information. | Main problems were initial prescribing in hospitals and communication with patients when changing drugs.                                                           | Papers about establishing QCs in Germany using data on everyday practice to improve prescription patterns. |
| Wensing 2004 <sup>41</sup> | Germany /<br>Saxony-Anhalt | Controlled before-and-after study | PHC     | 87 GPs in 10 groups of 7–12; control group: 90 GPs not participating in the intervention. | Evaluation after 2 years | Determine the impact of a large-scale programme of QCs on quality and costs of prescribing, 11 meetings of 2 hours, existing QCs promoted by the association of statutory health insurance. | A trained facilitator (GP) supported the group.                                                                      | Structured feedback report, patient video, evidence-based material, interactive learning and reflective thinking about willingness to change.                                | High satisfaction with QCs. Prescriptions decreased in the intervention group while increasing in the control group. Aspects of quality of prescriptions improved. |                                                                                                            |
| Andres 2004 <sup>42</sup>  | Germany /<br>Hessen        | Survey                            | PHC     | 483 out of 612 GPs (57 QCs) answered.                                                     | Evaluation after 2 years | Evaluate participants' experiences of existing QCs taking part in a large project.                                                                                                          | 7–10 GPs in each QC, facilitator guiding through the process, support by academic staff members.                     | Personal prescription data with the opportunity to compare with colleagues.                                                                                                  | Positive effects on medical practice and increase in knowledge.                                                                                                    |                                                                                                            |

## Supplemental material 7 Study characteristics

| Author year                  | Country                            | Study design                                                                      | Setting | Participants, professional background                                         | Study duration                                                                   | Objective and intervention setting                                                                                                                                            | Facilitation and group dynamics                      | Didactic and QI technique                                                                                                                                                                                 | Outcome oriented data                                                                                                                                                        | Common characteristics of the cluster (kinship)                                                            |
|------------------------------|------------------------------------|-----------------------------------------------------------------------------------|---------|-------------------------------------------------------------------------------|----------------------------------------------------------------------------------|-------------------------------------------------------------------------------------------------------------------------------------------------------------------------------|------------------------------------------------------|-----------------------------------------------------------------------------------------------------------------------------------------------------------------------------------------------------------|------------------------------------------------------------------------------------------------------------------------------------------------------------------------------|------------------------------------------------------------------------------------------------------------|
| Fessler 2006 <sup>43</sup>   | Germany (Rhine Main)               | Controlled before-and-after study                                                 | PHC     | 90 GPs participating in QCs were compared to non-participants in another area | Evaluation after 2 or 3 years                                                    | Improve prescription patterns concerning statins, antidiabetics, other drugs for cardiovascular diseases. Intervention in existing QCs.                                       | Facilitated group work every 4–6 weeks.              | QC process according to German standards; discussion of any results not in line with guidelines.                                                                                                          | Guideline adherence increased.                                                                                                                                               | Papers about establishing QCs in Germany using data on everyday practice to improve prescription patterns. |
| Papendick 2006 <sup>44</sup> | Germany (Rhine Main)               | Controlled before-and-after study                                                 | PHC     | 59 GPs participating in QCs compared to 52 non-participants                   | Evaluation after 12 months                                                       | Examine the development of drug costs among GPs participating in existing QCs.                                                                                                | Facilitated group work every 4–6 weeks.              | QC process according to German standards; discussion of any results not in line with guidelines.                                                                                                          | The cost of medical drugs and the increase in expenditure were lower compared to the control group.                                                                          |                                                                                                            |
| Wensing 2009 <sup>45</sup>   | Hesse, Lower Saxony, Saxony-Anhalt | 3 controlled before-and-after studies with baseline in 2001 and follow-up in 2003 | PHC     | 1090 GPs in the intervention group and 2090 in the control group.             | Baseline data 3 months; evaluation using another 3 months' data after 24 months. | Determine the effectiveness of the QC process on prescribing patterns in existing and new QC groups. Data were gathered on different groups of drugs. One QC meeting a month. | 8–14 physicians in a group, trained facilitator (GP) | Repeated feedback on prescribing patterns, evidence-based information, reasons for variations were discussed, case-based discussions, objectives for improvement were formulated and specific plans made. | Attendance rate 71–79%, high satisfaction >80%. Reduction of mean prescription costs per patient, increased prescription of recommended drugs compared to the control group. |                                                                                                            |



## Supplemental material 7 Study characteristics

| Author year               | Country                                                   | Study design                      | Setting | Participants, professional background                                                                                                 | Study duration | Objective and intervention setting                                                                                                    | Facilitation and group dynamics                                                       | Didactic and QI technique                                                                                                                                                                            | Outcome oriented data                                                                                                                                    | Common characteristics of the cluster (kinship)                         |
|---------------------------|-----------------------------------------------------------|-----------------------------------|---------|---------------------------------------------------------------------------------------------------------------------------------------|----------------|---------------------------------------------------------------------------------------------------------------------------------------|---------------------------------------------------------------------------------------|------------------------------------------------------------------------------------------------------------------------------------------------------------------------------------------------------|----------------------------------------------------------------------------------------------------------------------------------------------------------|-------------------------------------------------------------------------|
| Andres 2010 <sup>46</sup> | Hesse, Saxony-Anhalt, Westfalen-Lippe, Schleswig-Holstein | Interrupted time series 1995–2007 | PHC     | 1242 QCs documented 27,255 meetings. Evaluation of QCs only if they meet at regular intervals and have done so for at least one year. | 12 years       | Assess the quality of the structure, processes and results of existing QCs promoted by the association of statutory health insurance. | Facilitators questioned the groups and tried to detail an agreement on best practice. | A group of GPs met at regular intervals to consider their standard practice. Their work was based on personal experience, own data and was target-oriented to promote quality in their own practice. | 8 and 12 meetings per year, group atmosphere was generally very good; the proposed method was actually used in the groups; consensus was often achieved. |                                                                         |
| Beyer 1999 <sup>47</sup>  | Saxony-Anhalt, Bremen                                     | Cross-sectional survey            | PHC     | 2412 out of 4270 answered                                                                                                             | Not applicable | Analysis of demands and expectations on supporting institutions                                                                       | Not applicable                                                                        | Not applicable                                                                                                                                                                                       | GPs reported good emotional support from colleagues, improved professional self-confidence, but also fear of control and excessive demands.              | Paper about evaluation of reasons for and against participation in QCs. |
| Aubke 2003 <sup>48</sup>  | Westphalia-Lippe                                          | Cross-sectional survey 1995–2001  | PHC     | 520 QCs with 7350 participants: 3260 meetings were evaluated                                                                          | 5 years        | Assessment of QI cycle in existing QCs using a checklist. 15 GPs in each group, meeting time 120 minutes on average                   | Not applicable                                                                        | QCs work both continuous and topic-centred, based on documentation from own practice with the aim of promoting their quality of care.                                                                | 29.6% of all QCs had implemented the PDCA cycle, 54.9% had partially implemented the characteristics.                                                    | Paper on QCs about evaluation of adherence to the PDCA cycle.           |

## Supplemental material 7 Study characteristics

| Author year                  | Country                          | Study design                                 | Setting      | Participants, professional background                                              | Study duration                                       | Objective and intervention setting                                                                           | Facilitation and group dynamics                                | Didactic and QI technique                                                                                                                                                      | Outcome oriented data                                                                                     | Common characteristics of the cluster (kinship)                                         |
|------------------------------|----------------------------------|----------------------------------------------|--------------|------------------------------------------------------------------------------------|------------------------------------------------------|--------------------------------------------------------------------------------------------------------------|----------------------------------------------------------------|--------------------------------------------------------------------------------------------------------------------------------------------------------------------------------|-----------------------------------------------------------------------------------------------------------|-----------------------------------------------------------------------------------------|
| Beyer 2003 <sup>49</sup>     | Germany and European countries   | Cross-sectional survey among EQuiP delegates | European PHC | Reports of EQuiP delegates from 26 countries                                       | Cross-sectional                                      | Provide an overview of QC activities across Europe.                                                          | Facilitator is usually a GP.                                   | A consistent group of 8 to 15 health-care professionals meet at regular intervals to consider and reflect on their standard practice.                                          | High activity of QCs (i.e. > 10% of all GPs are involved) in 9 European countries.                        | Paper about the spread of QCs across Europe (Update Rohrbasser 2019).                   |
| Mols 2005 <sup>50</sup>      | Germany (Black Forest region)    | Controlled before-and-after study            | PHC          | 36 GPs in QCs treated 75 patients, 25 GPs in the control group treated 51 patients | Baseline after 6 months, evaluation after 18 months. | Study the effect of existing QCs on secondary prevention of stroke.                                          | Facilitated group work every 6 to 8 weeks.                     | QC process according to German standards.                                                                                                                                      | QCs did not have an additional effect on secondary prevention after stroke compared to the control group. | Paper on QCs about testing guideline adherence.                                         |
| Schneider 2007 <sup>51</sup> | Germany                          | Randomised controlled trial                  | PHC          | 12 QCs involving 96 GPs; out of 256 participants, 185 responded to the follow-up.  | Evaluation after 1 year                              | Evaluate the efficacy of QCs for asthma care working with individual feedback with and without benchmarking. | Trained facilitators supported the groups in the process.      | Collective discussion of evidence-based pharmacotherapy and management of patients on the basis of prescribing data.                                                           | Both groups improved their guideline adherence.                                                           | Testing the question whether benchmarking in QCs improves guideline adherence - or not. |
| Vollmar 2007 <sup>52</sup>   | Germany (North-Rhine Westphalia) | Protocol of a randomised controlled trial    | PHC          | 174 GPs in approx. 20 QCs                                                          | Evaluation after 3 meetings (6 months)               | Improve GPs knowledge and skills about people with dementia.                                                 | QCs are facilitated by a trainer rather than by a facilitator. | Study concept A: e-learning followed by case discussions in QCs. Study concept B: oral presentation of evidence-based information followed by a discussion led by a presenter. | Possible change of behaviour, use and acceptance of new learning tools.                                   | Papers about evaluation of e-learning methods in QCs.                                   |

## Supplemental material 7 Study characteristics

| Author year                 | Country                          | Study design                | Setting    | Participants, professional background         | Study duration           | Objective and intervention setting                                                                            | Facilitation and group dynamics                                                                                                               | Didactic and QI technique                                                                                                                                      | Outcome oriented data                                                                                              | Common characteristics of the cluster (kinship)                   |
|-----------------------------|----------------------------------|-----------------------------|------------|-----------------------------------------------|--------------------------|---------------------------------------------------------------------------------------------------------------|-----------------------------------------------------------------------------------------------------------------------------------------------|----------------------------------------------------------------------------------------------------------------------------------------------------------------|--------------------------------------------------------------------------------------------------------------------|-------------------------------------------------------------------|
| Vollmar 2009 <sup>53</sup>  | Germany (North-Rhine Westphalia) | Cross-sectional survey      | PHC        | 264 out of 449 GPs answered the questionnaire | Cross-sectional          | Gain understanding of German GPs' preferences for different forms of educational methods, such as e-learning. | Not applicable                                                                                                                                | Not applicable                                                                                                                                                 | Approx. 70% wanted to discuss everyday practice with colleagues. Meeting experts and e-learning were not favoured. |                                                                   |
| Vollmar 2010 <sup>54</sup>  | Germany (North-Rhine Westphalia) | Randomised controlled trial | German PHC | 166 GPs in 26 QCs                             | 1 year after study start | Compare knowledge acquisition about dementia management between blended learning and QC methods alone.        | QCs are facilitated by a trainer rather than by a facilitator                                                                                 | Study concept A: e-learning followed by case discussions in QCs. Study concept B: oral presentation of evidence-based information and its discussions in a QC. | Groups A and B improved their knowledge. A blended learning approach was not superior to the QC approach.          |                                                                   |
| Siebolds 2012 <sup>55</sup> | Germany                          | Survey                      | PHC        | 83 facilitators received survey               | Cross-sectional          | Evaluation of training and support for facilitators by tutors.                                                | To support facilitators, the KBV (National Association of Statutory Health Insurance) developed structured didactic handouts for the QC work. | Guidelines of the National Association of Statutory Health Insurance for Quality Assurance Procedures.                                                         | High level of satisfaction with didactic handouts (manuals) and training opportunities.                            | Paper about the quality of training and support for facilitators. |

## Supplemental material 7 Study characteristics

| Author year                 | Country     | Study design                      | Setting | Participants, professional background | Study duration           | Objective and intervention setting                                        | Facilitation and group dynamics                                                                                                                          | Didactic and QI technique                                                                                                                                      | Outcome oriented data                                                                                                                               | Common characteristics of the cluster (kinship) |
|-----------------------------|-------------|-----------------------------------|---------|---------------------------------------|--------------------------|---------------------------------------------------------------------------|----------------------------------------------------------------------------------------------------------------------------------------------------------|----------------------------------------------------------------------------------------------------------------------------------------------------------------|-----------------------------------------------------------------------------------------------------------------------------------------------------|-------------------------------------------------|
| Swiss QCs                   |             |                                   |         |                                       |                          |                                                                           |                                                                                                                                                          |                                                                                                                                                                |                                                                                                                                                     |                                                 |
| Bugnon 2004 <sup>56</sup>   | Switzerland | Controlled before-and-after study | PHC     | 6–10 GPs in 1 QC.                     | Development over 3 years | Improve prescription patterns and reduce costs for drug prescriptions.    | A pharmacist facilitated the group through the process of academic detailing. The group engaged in local networking. Group cohesion increased with time. | Evidence-based information, feedback on prescriptions including information about possible substitutions. Consensus discussions and agreement on best choices. | Improvement of prescription patterns (antibiotics, antidiabetic and antihypertensive drugs, NSAIDs); reduction of costs compared to control groups. | Papers about pharmacist-led QCs in Switzerland. |
| Niquille 2010 <sup>57</sup> | Switzerland | Controlled before-and-after study | PHC     | 24 GPs in 6 QCs                       | Development over 9 years | Improve prescription patterns and to reduce costs for drug prescriptions. | A pharmacist facilitated groups of 3–6 GPs through the process of academic detailing. Group cohesion increased with time.                                | As in Bugnon 2004                                                                                                                                              | 42% decrease in drug costs, improved adherence to prescription guidelines compared to control group.                                                |                                                 |

## Supplemental material 7 Study characteristics

| Author year                   | Country | Study design                         | Setting       | Participants, professional background                                         | Study duration | Objective and intervention setting                                                                                    | Facilitation and group dynamics                                              | Didactic and QI technique                                                                                                                                                                                                        | Outcome oriented data                                                                              | Common characteristics of the cluster (kinship)                                                                   |
|-------------------------------|---------|--------------------------------------|---------------|-------------------------------------------------------------------------------|----------------|-----------------------------------------------------------------------------------------------------------------------|------------------------------------------------------------------------------|----------------------------------------------------------------------------------------------------------------------------------------------------------------------------------------------------------------------------------|----------------------------------------------------------------------------------------------------|-------------------------------------------------------------------------------------------------------------------|
| <b>Drug Education Project</b> |         |                                      |               |                                                                               |                |                                                                                                                       |                                                                              |                                                                                                                                                                                                                                  |                                                                                                    |                                                                                                                   |
| Lundborg 1999 <sup>58</sup>   | Sweden  | Randomised controlled trial          | PHC           | 18 groups (104 GPs) compared with 18 groups (100 GPs), 3–10 GPs in each group | 6 months       | Improve the treatment of asthma and urinary tract infections. The two study groups served as controls for each other. | Pharmacists facilitated the GP groups, two meetings, each meeting 1.5 hours. | Information on their judgements of written simulated cases. Discussion of actual decisions taken on the simulated cases. Discussion of personal experience of difficult clinical cases and underlying reasons for prescriptions. | Guideline adherence increased for patients with urinary tract infections and patients with asthma. | QC study on improving drug prescriptions in Sweden, Norway, The Netherlands and Slovakia: Drug Education Project. |
| Lundborg 1999 <sup>59</sup>   | Sweden  | GPs' evaluation of the trial: survey | Swedish PHC   | 82 out of 104 GPs and 83 out of 100 GPs responded.                            | 6 months       | Capture GPs' experiences of the trial through a questionnaire.                                                        | As above in Lundborg 1999                                                    | As above in Lundborg 1999                                                                                                                                                                                                        | 87% of participating GPs wanted to take part in similar CME activities for other conditions.       |                                                                                                                   |
| Lagerlov 2000 <sup>60</sup>   | Norway  | Randomised controlled trial          | Norwegian PHC | 32 groups (199 GPs), 4–8 GPs in each group                                    | 6 months       | As above in Lundborg 1999                                                                                             | As above in Lundborg 1999                                                    | As above in Lundborg 1999.                                                                                                                                                                                                       | Guideline adherence increased.                                                                     |                                                                                                                   |

## Supplemental material 7 Study characteristics

| Author year                    | Country                           | Study design                                       | Setting                                     | Participants, professional background                                                                                     | Study duration                | Objective and intervention setting                                                                                                                 | Facilitation and group dynamics                                                                 | Didactic and QI technique                                                                            | Outcome oriented data                                                                                                   | Common characteristics of the cluster (kinship)                                                                         |
|--------------------------------|-----------------------------------|----------------------------------------------------|---------------------------------------------|---------------------------------------------------------------------------------------------------------------------------|-------------------------------|----------------------------------------------------------------------------------------------------------------------------------------------------|-------------------------------------------------------------------------------------------------|------------------------------------------------------------------------------------------------------|-------------------------------------------------------------------------------------------------------------------------|-------------------------------------------------------------------------------------------------------------------------|
| Veninga 1999 <sup>61</sup>     | Sweden, Slovakia, The Netherlands | Evaluation of a randomised controlled trial        | Swedish, Norwegian, Dutch and Slovakian PHC | The Netherlands: 24 groups, 181 GPs; Sweden: 36 groups, 204 GPs; Norway: 32 groups, 199 GPs; Slovakia: 20 groups, 81 GPs. | 6 months                      | Explore whether a specific educational approach for implementation of guidelines has a similar effect when used in different health care settings. | As above in Lundborg 1999 (Slovakia only one meeting).                                          | As above in Lundborg 1999                                                                            | Attitudes changed and prescription patterns improved.                                                                   | QC study on improving drug prescriptions in Sweden, Norway, The Netherlands and Slovakia: Drug Education Project (DEP). |
| Veninga 2000 <sup>62</sup>     | The Netherlands                   | Randomised controlled trial                        | PHC                                         | 24 groups (181 GPs)                                                                                                       | 6 months                      | As above in Lundborg 1999                                                                                                                          | As above in Lundborg 1999                                                                       | As above in Lundborg 1999                                                                            | Guideline adherence increased.                                                                                          |                                                                                                                         |
| <b>European single studies</b> |                                   |                                                    |                                             |                                                                                                                           |                               |                                                                                                                                                    |                                                                                                 |                                                                                                      |                                                                                                                         |                                                                                                                         |
| Eliasson 1999 <sup>63</sup>    | Sweden                            | Literature review, survey and authors' reflections | PHC                                         | 5–10 GPs in each of approx. 230 groups                                                                                    | Meeting once to twice a month | Give an overview of CME group work in Sweden and describe its strengths and weaknesses.                                                            | Facilitated group discussions. Reflection on emotional responses was part of the group process. | Prearranged modules with short introductions and facts on a topic. Discussions based on experiences. | 80% of the group members assessed the pedagogical value of the group sessions as more valuable than direct instruction. | Paper on Swedish QCs                                                                                                    |

## Supplemental material 7 Study characteristics

| Author year                | Country | Study design                      | Setting | Participants, professional background                                                                                                                 | Study duration                            | Objective and intervention setting                                                                                                                       | Facilitation and group dynamics                                                                                                                                                                                    | Didactic and QI technique                                                                                                                                                                                              | Outcome oriented data                                                                                                                               | Common characteristics of the cluster (kinship)          |
|----------------------------|---------|-----------------------------------|---------|-------------------------------------------------------------------------------------------------------------------------------------------------------|-------------------------------------------|----------------------------------------------------------------------------------------------------------------------------------------------------------|--------------------------------------------------------------------------------------------------------------------------------------------------------------------------------------------------------------------|------------------------------------------------------------------------------------------------------------------------------------------------------------------------------------------------------------------------|-----------------------------------------------------------------------------------------------------------------------------------------------------|----------------------------------------------------------|
| Watkins 2004 <sup>64</sup> | England | Qualitative study: focus group    | PHC     | 6 different facilitators with different backgrounds. A total of 19 GPs in four practices and one practice manager took part. 11 GPs were interviewed. | 7 monthly sessions taking place at midday | Reflect on inappropriate and costly prescribing. Investigate feasibility of educational sessions for GPs: acceptability among GPs and possible barriers. | 'Reflective practice' as a potential solution to high-cost prescribing. GPs felt that participation was to appease their prescribing adviser. No or little sense of ownership. Information overload was a problem. | Video-tape of a scenario, followed by brainstorming, and personal responses in the group. 'Best buy' response was selected. Identification of barriers to implementation and discussion of means to overcome barriers. | Low response for participation (4 out of 61 practices). There was friction between clinical autonomy and the experience of a top-down intervention. | Paper on English QCs (reflective groups)                 |
| Tonies 2006 <sup>65</sup>  | Austria | Survey                            | PHC     | In 2001, 29 GPs out of 169 (17%) responded; in 2002, 46 out of 272 (27%) responded.                                                                   | Evaluation after 4 years of offering QCs  | Improve care of patients with drug replacement therapy using synthetic opioids in PHC.                                                                   | A GP facilitated the group and had the support of an experienced local opinion leader.                                                                                                                             | Local opinion leaders introduced topics. Stimulation of discussions to increase self-awareness and frustration tolerance.                                                                                              | High level of satisfaction with the teaching. Communication skills improved. Topic-specific knowledge increased.                                    | Topic-specific QC activities in Austria.                 |
| Riou 2007 <sup>66</sup>    | France  | Controlled before-and-after study | PHC     | Number of groups is not mentioned, 7–11 GPs per group, 24 participating GPs, 3–6 local pharmacists in each area.                                      | 12 months (Dec 2001 to Dec 2002)          | Improve prescription patterns in three semi-rural areas of Brittany, France. Financial incentive.                                                        | 4 plenary meetings with consultants lecturing on pre-specified topics. QCs every 6th week using personalised feedback.                                                                                             | Expert input during plenary sessions, voluntary feedback, peer review and specific recommendations for changes during QCs.                                                                                             | Increase in generic prescription rates and decreased prescription of drugs with no evidence-based efficacy.                                         | French QC study on improving drug prescription patterns. |

## Supplemental material 7 Study characteristics

| Author year                    | Country      | Study design                                                            | Setting | Participants, professional background                                                                                        | Study duration                          | Objective and intervention setting                                                                                    | Facilitation and group dynamics                                                                                                   | Didactic and QI technique                                                                                                                                                                                                  | Outcome oriented data                                                                                                                  | Common characteristics of the cluster (kinship)   |
|--------------------------------|--------------|-------------------------------------------------------------------------|---------|------------------------------------------------------------------------------------------------------------------------------|-----------------------------------------|-----------------------------------------------------------------------------------------------------------------------|-----------------------------------------------------------------------------------------------------------------------------------|----------------------------------------------------------------------------------------------------------------------------------------------------------------------------------------------------------------------------|----------------------------------------------------------------------------------------------------------------------------------------|---------------------------------------------------|
| van Driel 2007 <sup>67</sup>   | Belgium      | Cluster randomised controlled trial                                     | PHC     | 9 QCs (122 GPs) in the intervention and 9 QCs (134 GPs) in the control group                                                 | November 2004 to March 2005             | Improve antibiotic prescribing in patients with rhinosinusitis. Existing QCs.                                         | The group meetings were scheduled as regular QC sessions without the presence of an external expert.                              | Dissemination of the guidelines by e-mail; facilitators received educational material concerning antibiotics.                                                                                                              | A single intervention in QCs did not have a significant effect on prescription patterns.                                               | Belgian QC study on improving drug prescription.  |
| Spiegel 2012 <sup>68</sup>     | Austria      | Qualitative evaluation                                                  | PHC     | 445 out of 821 GPs took part in the groups, 8–10 participants in each group                                                  | 2 years: 2004 and 2005                  | Explore GPs' perception of QCs concerning prescribing habits. Qualitative analysis was used to evaluate QC protocols. | Facilitators' duties were to schedule dates for QCs, give introductory talks on intended topics and facilitate the group process. | Use of educational material on various issues of pharmacotherapy; costs were addressed; provision of personal feedback on prescription habits.                                                                             | Prescription of generic drugs increased.                                                                                               | Austrian QC study on improving drug prescription. |
| <b>OTHER AREAS</b>             |              |                                                                         |         |                                                                                                                              |                                         |                                                                                                                       |                                                                                                                                   |                                                                                                                                                                                                                            |                                                                                                                                        |                                                   |
| de Villiers 2003 <sup>69</sup> | South Africa | Qualitative evaluation using Nominal Group Technique followed by survey | PHC     | 64 GPs answered (response rate 38%), 51 out of 101 responding GPs had participated in QC, 8 out of 12 facilitators responded | Evaluation of 9 months CME/CPD activity | A nominal group technique was used to compose two questionnaires (for participants and facilitators)                  | Facilitated small-group activities                                                                                                | Activities built on previous experience, involved the learners, focussed on relevant problems; solutions were applicable in practice; the process followed a cycle of action-reflection and GPs acquired technical skills. | 91% of the respondents indicated improved knowledge, 73% indicated improvements in their patient care and 61% improved clinical skills | South African QCs                                 |



## Supplemental material 7 Study characteristics

| Author year                 | Country          | Study design                                                  | Setting | Participants, professional background                                                                                 | Study duration           | Objective and intervention setting                                                                                                                               | Facilitation and group dynamics                                                                                                               | Didactic and QI technique                                                                                                                                      | Outcome oriented data                                                                                                                             | Common characteristics of the cluster (kinship)        |
|-----------------------------|------------------|---------------------------------------------------------------|---------|-----------------------------------------------------------------------------------------------------------------------|--------------------------|------------------------------------------------------------------------------------------------------------------------------------------------------------------|-----------------------------------------------------------------------------------------------------------------------------------------------|----------------------------------------------------------------------------------------------------------------------------------------------------------------|---------------------------------------------------------------------------------------------------------------------------------------------------|--------------------------------------------------------|
| Richards 2003 <sup>70</sup> | New Zealand      | Pilot study: retrospective, controlled before-and-after study | PHC     | 52 GPs in small education groups: approx. 10 GPs in each group                                                        | After 1 and 2 years      | Determine whether a QC-programme designed to promote rational GP prescribing succeeds in changing practice when added to audit and feedback, academic detailing. | Meetings were monthly and group composition remained the same over time.                                                                      | Control group: audit and feedback on prescription habits, academic detailing and educational bulletins. Intervention group: peer-led groups, monthly meetings. | Positive effect of the education strategy in groups compared to the combination of audit and feedback and academic detailing.                     | QCs on improving drug prescriptions in New Zealand.    |
| Parker 2007 <sup>71</sup>   | USA (Hawaii)     | Randomised controlled trial                                   | PHC     | 4 health-care facilities of similar size participated and were randomly assigned the local or the central QI approach | Duration about 2.5 years | Compare the participatory local approach with the central expert approach to QI in depression care.                                                              | Researchers allowed teams to design their own programmes. Local QI groups had a facilitator.                                                  | The QI teams followed guidance regarding team composition and process. The central expert approach used centrally organised teams of experts.                  | A hybrid model (central expertise and local participation) may be the most effective approach to maintain a high level of motivation.             | QCs on Hawaii compared to centrally steered options.   |
| Sommers 2007 <sup>72</sup>  | USA (California) | Survey and attendance rate                                    | PHC     | Researchers invited 30 sites, 11 (103 GPs) out of 14 sites who started continued with their meetings                  | 5 years                  | Introduce small-group meetings as means of managing clinical uncertainty.                                                                                        | A group member or an invited, external member facilitated discussions, searched for and appraised evidence and coordinated meeting logistics. | Reflection on and appraisal of one's own delivery of clinical care. Case-based discussion and reflection.                                                      | Most common themes: being with colleagues, the role of time in GP practice. Other common themes: acknowledging uncertainty, receiving validation. | Practice-Based Learning and Improvement in California. |

## Supplemental material 7 Study characteristics

| Author year                 | Country              | Study design                                         | Setting | Participants, professional background                                       | Study duration | Objective and intervention setting                                                                                                                 | Facilitation and group dynamics                                                                                                                          | Didactic and QI technique                                                                                                                                                            | Outcome oriented data                                                                                                                 | Common characteristics of the cluster (kinship)              |
|-----------------------------|----------------------|------------------------------------------------------|---------|-----------------------------------------------------------------------------|----------------|----------------------------------------------------------------------------------------------------------------------------------------------------|----------------------------------------------------------------------------------------------------------------------------------------------------------|--------------------------------------------------------------------------------------------------------------------------------------------------------------------------------------|---------------------------------------------------------------------------------------------------------------------------------------|--------------------------------------------------------------|
| Murrihy 2009 <sup>73</sup>  | Australia            | Before-and-after study                               | PHC     | 6 groups of GPs (32 GPs)                                                    | 6 months       | Improve GPs' skills and actual use of cognitive behaviour therapy. 8 two-hour sessions.                                                            | Expert-led small-group interactive learning, and ongoing discussion of patients.                                                                         | Development of mentor-type relationships, the use of interactive learning and skills-based training, discussion of ongoing patients.                                                 | GPs' knowledge, skills in and actual use of cognitive behaviour therapy increased.                                                    | QCs in Australia.                                            |
| <b>UPDATE December 2020</b> |                      |                                                      |         |                                                                             |                |                                                                                                                                                    |                                                                                                                                                          |                                                                                                                                                                                      |                                                                                                                                       |                                                              |
| Fisher 2013 <sup>74</sup>   | North East Ohio, USA | Before-and-after study and survey (qualitative data) | PHC     | 78 participants in 20 practices/groups; some groups were inter-professional | 1 year         | The American Board of Medical Specialties' Performance and Practice initiated the project to support GPs in working in groups to improve practice. | A coach facilitated the process, led discussions, helped the team to recognise their skills, to identify the next steps and to address problems arising. | Physicians discussed their priorities for improvement, narrowed the topic, reflected on results of patient surveys and shared their view of 'best practice' using personal examples. | Introduction of QI tools into groups succeeded. Participants felt that the group activity encouraged collaboration with colleagues.   | Practice-Based Learning and Improvement in the USA.          |
| Francois 2013 <sup>75</sup> | Isère, France        | Survey                                               | PHC     | 16 groups, 132 GPs                                                          | Not applicable | Review the implementation of QCs by mapping the groups, describe the perspective of participants and study how these groups work.                  | Facilitators helped the groups to share experiences and to discuss difficult cases and medical errors.                                                   | Case discussions, audit charts to analyse prescription habits, interactive learning, reflective thinking and consensus-finding, local opinion leaders.                               | 6–10 GPs in each group, meetings lasted between 1 and 2.5 hrs, 6–10 meetings per year, participants had a high level of satisfaction. | Description of QC development in Isère, France.              |
| Wilcock 2013 <sup>76</sup>  | England              | Cluster randomised controlled trial                  | PHC     | 11 practices using workshops, 12 practices usual care                       | 12 months      | Test of a tailored educational intervention on the clinical management of                                                                          | Facilitated small-group workshops with practice teams.                                                                                                   | Adult learning approach to solving real-world problems, tailoring the learning need, using                                                                                           | The intervention did not alter the clinical management of patients with                                                               | QC-like intervention in England testing guideline adherence. |

## Supplemental material 7 Study characteristics

| Author year                 | Country         | Study design                                      | Setting | Participants, professional background                               | Study duration | Objective and intervention setting                                                                                                           | Facilitation and group dynamics                                                                                                                              | Didactic and QI technique                                                                                                                                   | Outcome oriented data                                                                                                      | Common characteristics of the cluster (kinship)     |
|-----------------------------|-----------------|---------------------------------------------------|---------|---------------------------------------------------------------------|----------------|----------------------------------------------------------------------------------------------------------------------------------------------|--------------------------------------------------------------------------------------------------------------------------------------------------------------|-------------------------------------------------------------------------------------------------------------------------------------------------------------|----------------------------------------------------------------------------------------------------------------------------|-----------------------------------------------------|
|                             |                 |                                                   |         | (NICE guidelines)                                                   |                | people with dementia.                                                                                                                        |                                                                                                                                                              | workshops at the work place.                                                                                                                                | dementia.                                                                                                                  |                                                     |
| Andres 2015 <sup>77</sup>   | Germany         | Focus group                                       | PHC     | 12 health-care professionals                                        | Not applicable | Evaluation of 20 years' QC work                                                                                                              | Maintaining autonomy, self-determination of topics and the process in QCs ensure the practical relevance of topics and emotional engagement of participants. | Case-based learning among peers in a facilitated group process is key in the QC process.                                                                    | Measures to support QC-work: evidence-based information and trustworthy prescription patterns.                             | 20 years' experience of QCs in Germany              |
| Dowling 2015 <sup>78</sup>  | Ireland         | Survey                                            | PHC     | 96% of GPs participating in CME groups responded (1366), 146 groups | Not applicable | Investigate whether taking part in CME groups improves GPs' clinical knowledge.                                                              | A local, small-group setting provides live peer-group interaction, peer support and reflection on practice.                                                  | Face-to-face activities, multiple exposure, the use of multi-media and multiple education techniques.                                                       | 97% stated that they want to improve their clinical practice, 86.3% agreed that taking part in CME groups is key for this. | QCs in Ireland                                      |
| Verbakel 2015 <sup>79</sup> | The Netherlands | A three-group cluster randomised controlled trial | PHC     | 10 groups in each intervention group                                | 4 months       | Assess the effect of two interventions on patient safety culture: a survey compared to adding a QC-like intervention compared to usual care. | Team-based reflection on personal practice data and team-based development of action plan.                                                                   | Didactics were added to the experiential learning principles of Kolb, for example, concrete experience, reflection, conceptualisation, and experimentation. | Increased reporting of critical incidents                                                                                  | Dutch QC study on improving patient safety culture. |

## Supplemental material 7 Study characteristics

| Author year                   | Country                              | Study design                                      | Setting | Participants, professional background                                                   | Study duration | Objective and intervention setting                                                                                                            | Facilitation and group dynamics                                                      | Didactic and QI technique                                                                                                                                              | Outcome oriented data                                                                | Common characteristics of the cluster (kinship)                      |
|-------------------------------|--------------------------------------|---------------------------------------------------|---------|-----------------------------------------------------------------------------------------|----------------|-----------------------------------------------------------------------------------------------------------------------------------------------|--------------------------------------------------------------------------------------|------------------------------------------------------------------------------------------------------------------------------------------------------------------------|--------------------------------------------------------------------------------------|----------------------------------------------------------------------|
| Mahlknecht 2016 <sup>80</sup> | Austria (Salzburg) and Italy (Tirol) | Before-and after-study                            | PHC     | 20 GPs in regional QC groups (number of groups not mentioned)                           | 3 years        | Assess whether quality can be improved by self-auditing, benchmarking and QCs.                                                                | Facilitated, regular group meetings                                                  | Critical self-reflection, audits and feedback, benchmarking.                                                                                                           | The mean quality score increased significantly.                                      | Austrian–Italian study using benchmarking in QCs.                    |
| Vervloet 2016 <sup>81</sup>   | The Netherlands                      | Controlled before-and-after study                 | PHC     | 4 groups (39 GPs) in the intervention and 4 groups (38 GPs) in the control group        | 1 year         | Evaluate the effect of a multifaceted, peer-group-based intervention aiming to reduce respiratory tract related antibiotic prescriptions.     | A series of regular meetings between GPs and pharmacists in the same catchment area. | Communication skills training, including communication about delayed prescribing, quarterly feedback figures for GPs.                                                  | Guideline adherence increased.                                                       | Dutch QC study on improving drug prescription involving pharmacists. |
| Jäger 2013 <sup>82</sup>      | Germany                              | Protocol of a cluster randomised controlled trial | PHC     | 10 QCs (40 GPs)                                                                         | 6 months       | To implement structured medication counselling, use of medication lists and medication reviews to avoid potentially inappropriate medication. | QC meetings every three months.                                                      | Development of individual concepts of change and their presentation at QC meetings. Posters and flyers for patients. Written feedback on individual practice patterns. | The degree of implementation of the three recommendations measured at patient level. | German QC study on improving drug prescription.                      |
| Jäger 2015 <sup>83</sup>      | Germany                              | Description of intervention                       | PHC     | 12 GPs and 8 medical practice assistants from 8 practices participated in the workshop. | 6 months       | Describe the content and delivery of the tailored intervention.                                                                               | No further mention of QCs in the paper.                                              | Workshops about structured medication counselling, use of medication lists and medication reviews to avoid potentially inappropriate medication.                       | The workshop seemed to improve participants' knowledge of medication management.     | German QC study on improving drug prescription.                      |

## Supplemental material 7 Study characteristics

| Author year                   | Country         | Study design                                                                             | Setting | Participants, professional background                                                         | Study duration                | Objective and intervention setting                                                          | Facilitation and group dynamics                                                    | Didactic and QI technique                                                                                                                                            | Outcome oriented data                                                                                                                                                                       | Common characteristics of the cluster (kinship)                      |
|-------------------------------|-----------------|------------------------------------------------------------------------------------------|---------|-----------------------------------------------------------------------------------------------|-------------------------------|---------------------------------------------------------------------------------------------|------------------------------------------------------------------------------------|----------------------------------------------------------------------------------------------------------------------------------------------------------------------|---------------------------------------------------------------------------------------------------------------------------------------------------------------------------------------------|----------------------------------------------------------------------|
| Jäger 2017 <sup>84</sup>      | Germany         | A cluster randomised controlled trial                                                    | PHC     | Intervention group: 10 GPs in 5 different QCs; control group: 11 GPs in 6 different QCs,      | 6 months                      | As above in Jaeger 2013                                                                     | Not mentioned                                                                      | Training for GPs and medical practice assistants, educational material for patients, individually developed action plans, written feedback on prescription patterns. | Little or no effect of the tailored programme on the combined primary outcome could be substantiated. Lack of statistical power to detect any effect.                                       |                                                                      |
| Jäger 2017 <sup>85</sup>      | Germany         | Interviews                                                                               | PHC     | Analysis of 12 interviews, 21 questionnaires, 120 documentation forms.                        | Evaluation of 6 months' study | To evaluate the study Jaeger 2017 using various data sources.                               | Facilitation or group dynamics were not described as QCs were not used as planned. | Workshop-like atmosphere of one meeting.                                                                                                                             | Patients were not able to use the tablets provided. Participants suggested integrating the training into QCs.                                                                               |                                                                      |
| Ter Brugge 2017 <sup>86</sup> | The Netherlands | Mixed-methods design: questionnaire about types of group meetings followed by interviews | PHC     | 78 out of 128 GP supervisors filled out the questionnaire; 18 GP supervisors were interviewed | Not applicable                | Examine different types of group meeting and explore the use of clinical research evidence. | Little discussion on clinical applicability of evidence.                           | Guidelines, local opinion leaders who lecture, consensus discussion.                                                                                                 | QCs are the type of group meeting that occur most often in PHC. They seem to be more goal-oriented than learning-oriented. The agenda was heavily influenced by health insurance companies. | Dutch QC study on improving drug prescription involving pharmacists. |

## Supplemental material 7 Study characteristics

| Author year                 | Country         | Study design                          | Setting | Participants, professional background | Study duration | Objective and intervention setting                                                                            | Facilitation and group dynamics                                                                                                                                  | Didactic and QI technique                                                                                                          | Outcome oriented data                                                                                                                                                                | Common characteristics of the cluster (kinship)                  |
|-----------------------------|-----------------|---------------------------------------|---------|---------------------------------------|----------------|---------------------------------------------------------------------------------------------------------------|------------------------------------------------------------------------------------------------------------------------------------------------------------------|------------------------------------------------------------------------------------------------------------------------------------|--------------------------------------------------------------------------------------------------------------------------------------------------------------------------------------|------------------------------------------------------------------|
| Trietsch 2017 <sup>87</sup> | The Netherlands | A cluster randomised controlled trial | PHC     | 21 QCs (197 GPs)                      | 3 years        | Test the effect of audit and feedback with peer review on GP' prescribing and test-ordering performance.      | Facilitation by local opinion leaders (laboratory specialist or local pharmacist) who were trained in a three-hour meeting. The groups met twice for each topic. | Facilitators had written and digital evidence-based materials, individual feedback reports                                         | The increase in total tests ordered was 3% in the intervention and 15% in the control group. The increase in prescriptions was 20% in the intervention and 66% in the control group. | Dutch QC study on improving test ordering and drug prescription. |
| Andres 2018 <sup>88</sup>   | Germany         | Controlled before and after study     | PHC     | 48 GPs                                | 12 months      | Test the effect of audit and feedback with peer review on quality indicators for coronary heart disease (CHD) | Classic German QC without further description                                                                                                                    | Individually presented 11 quality indicators for patients with CHD; feedback reports for each doctor's practice at two QC meetings | For three of these indicators the increase rates were higher than those in the Bavarian control group                                                                                | German study of use of quality indicators in QCs                 |
| Binienda 2018 <sup>89</sup> | USA (Ohio)      | Survey                                | PHC     | 126 GPs                               | Not applicable | To explore the research efforts of Practice Based Research Networks (PBRN)                                    | Not applicable                                                                                                                                                   | Not applicable                                                                                                                     | PBRNs currently thrive on conducting research predominantly in quality improvement and practice transformation                                                                       | QI in US                                                         |

## Supplemental material 7 Study characteristics

| Author year                 | Country        | Study design | Setting | Participants, professional background | Study duration | Objective and intervention setting                                                                                | Facilitation and group dynamics                                                                                                                                                                                                                           | Didactic and QI technique                                                                                                                                                                   | Outcome oriented data                                                                                          | Common characteristics of the cluster (kinship) |
|-----------------------------|----------------|--------------|---------|---------------------------------------|----------------|-------------------------------------------------------------------------------------------------------------------|-----------------------------------------------------------------------------------------------------------------------------------------------------------------------------------------------------------------------------------------------------------|---------------------------------------------------------------------------------------------------------------------------------------------------------------------------------------------|----------------------------------------------------------------------------------------------------------------|-------------------------------------------------|
| Kral 2018 <sup>90</sup>     | Czech Republic | Case study   | PHC     | GPs, not stated how many              | 6 months       | Use of quality circles as a support tool in the taking over of practices by young general practitioners.          | 1 <sup>st</sup> meeting, identification of problems; 2 <sup>nd</sup> meeting, discussion of specific issues of starting to practice; 3 <sup>rd</sup> meeting, analysis of the suggested measures and implementation; 4 <sup>th</sup> meeting, evaluation. | Facilitated discussions                                                                                                                                                                     | QC work offers a good platform for young GPs in starting their own practice.                                   | QC pilot in the Czech Republic                  |
| Park 2018 <sup>91</sup>     | Scotland       | Focus groups | PHC     | GPs/Practice Nurses/Pharmacists       | Not applicable | To determine how groups recruit new members and discern what are the important attributes of the new members.     | Not applicable                                                                                                                                                                                                                                            | Not applicable                                                                                                                                                                              | 4 themes: group formation and purpose; group culture; experience of group members; professional socialisation. | Recruitment to PBSG in Scotland                 |
| Pedersen 2018 <sup>92</sup> | Norway         | Case series  | PHC     | 53 health care professionals PHC      | 12 months      | to investigate what is discussed when QCs work to complete an action form as part of an audit and feedback cycle. | Insight into their own and their colleagues' practices.                                                                                                                                                                                                   | Discussion of results of the audit; identification of gaps between recommendations and local practice; choice of areas for improvement; addressing local barriers and enablers; evaluation. | Acting on audit and feedback provided an opportunity to discuss practice.                                      | QC I Norway                                     |

## Supplemental material 7 Study characteristics

| Author year                 | Country  | Study design                        | Setting | Participants, professional background                                       | Study duration                                                 | Objective and intervention setting                                                                                      | Facilitation and group dynamics | Didactic and QI technique | Outcome oriented data                                                                           | Common characteristics of the cluster (kinship)      |
|-----------------------------|----------|-------------------------------------|---------|-----------------------------------------------------------------------------|----------------------------------------------------------------|-------------------------------------------------------------------------------------------------------------------------|---------------------------------|---------------------------|-------------------------------------------------------------------------------------------------|------------------------------------------------------|
| Rognstad 2018 <sup>93</sup> | Norway   | Cluster-randomised controlled study | PHC     | 80 CME groups; 7–8 GPs in each group located in the southern part of Norway | 6 months: meetings once a month; the study covered 3 meetings. | To undertake a multifaceted, educational intervention to improve GPs' prescribing practice for patients aged $\geq$ 70. | See Rognstad 2013               | See Rognstad 2013         | Reduction of Potentially inappropriate prescriptions.                                           | Norwegian QC studies on improving drug prescriptions |
| Rognstad 2018 <sup>94</sup> | Norway   | Cluster-randomised controlled study | PHC     | 80 CME groups; 7–8 GPs in each group located in the southern part of Norway | 6 months: meetings once a month; the study covered 3 meetings. | To explore the characteristics of the GPs responding to QC intervention.                                                | See Rognstad 2013               | See Rognstad 2013         | GPs with the lowest adherence to recommended practice at baseline improved their practice most. | Norwegian QC studies on improving drug prescriptions |
| Willman 2018 <sup>95</sup>  | Scotland | Survey                              | PHC     | Not known                                                                   | Not applicable                                                 | To assess the educational impact of PBSGL.                                                                              | Not applicable                  | Not applicable            | PBSGL is an essential pillar for supporting all doctors in Defence Primary Healthcare.          | Scottish PBSGL                                       |



## Supplemental material 7 Study characteristics

| Author year                   | Country     | Study design           | Setting | Participants, professional background | Study duration       | Objective and intervention setting                                                                         | Facilitation and group dynamics                                                                             | Didactic and QI technique                                                                                                                      | Outcome oriented data                                                                                         | Common characteristics of the cluster (kinship) |
|-------------------------------|-------------|------------------------|---------|---------------------------------------|----------------------|------------------------------------------------------------------------------------------------------------|-------------------------------------------------------------------------------------------------------------|------------------------------------------------------------------------------------------------------------------------------------------------|---------------------------------------------------------------------------------------------------------------|-------------------------------------------------|
| Cunningham 2019 <sup>96</sup> | Scotland    | Evaluation             | PHC     | Not applicable                        | Overview of 17 years | To increase clinical knowledge and to implement it.                                                        | Facilitated discussion case presentations; study of current evidence base; proposal of changes to practice. | Members are encouraged to make a commitment to change, to log these changes in a shared document, and to review changes with their colleagues. | 3,400 members drawn from GPs, GP nurses, pharmacists and other professions.                                   | Scottish PBSGL overview                         |
| Dowling 2019 <sup>97</sup>    | Ireland     | Survey                 | PHC     | 1686 GPs answering the questionnaire  | Not applicable       | To examine whether local, accessible ongoing CME-SGL for rural GPs meets their educational needs.          | Not applicable                                                                                              | Not applicable                                                                                                                                 | 87% reported that their educational needs were fully or mostly met.                                           | Irish CME groups                                |
| Martin 2019 <sup>98</sup>     | Switzerland | Before and after study | PHC     | 9 GPs                                 | 2 years              | Assess status of colorectal carcinoma screening and use of shared decision when choosing screening method. | Facilitated small group work according to Swiss standards.                                                  | data-driven Plan-Do-Study-Act cycles to implement changes in practice.                                                                         | Through data-driven PDSA cycles and organisational changes, GPs implemented SDM tools in their daily routine. | Swiss QC on screening of colorectal carcinoma   |

## Supplemental material 7 Study characteristics

| Author year                    | Country | Study design                               | Setting | Participants, professional background | Study duration | Objective and intervention setting                                                                                                                       | Facilitation and group dynamics                                                                            | Didactic and QI technique                                                                                                             | Outcome oriented data                                                                                                | Common characteristics of the cluster (kinship) |
|--------------------------------|---------|--------------------------------------------|---------|---------------------------------------|----------------|----------------------------------------------------------------------------------------------------------------------------------------------------------|------------------------------------------------------------------------------------------------------------|---------------------------------------------------------------------------------------------------------------------------------------|----------------------------------------------------------------------------------------------------------------------|-------------------------------------------------|
| Siebenhöfer 2019 <sup>99</sup> | Germany | Cluster randomised controlled study        | PHC     | 52 general practices                  | 24 months      | To examine whether case management reduces thromboembolic events and major bleeding events.                                                              | Training for healthcare assistants; information and quality circles for GPs; 24 months of case management. | Quality circles to discuss practical problems; case discussions.                                                                      | The intervention appears to have positively influenced several process parameters under 'real-world conditions'.     | German QCs on antithrombotic treatment          |
| Armson 2020 <sup>100</sup>     | Canada  | Mixed methods                              | PHC     | 139 GPs                               | Not applicable | To assess feasibility and effectiveness of practice-based small-group learning in academic half days; questionnaire and interviews.                      | Participants were divided into groups of 14-16 members to discuss 12 different module topics.              | Presentation of clinical cases presented in educational modules and reflection on own clinical experiences; trained peer facilitator. | Feasible approach for half day learning sessions.                                                                    | Canadian PBSGL                                  |
| Dowling 2020 <sup>101</sup>    | Ireland | Before and after study using mixed methods | PHC     | 4 CME groups including 43 GPs         | 6 months       | To identify whether CME-small group learning increases knowledge and changes behaviour; questionnaires, prescribing audits and qualitative focus groups. | A two-hour teaching module on deprescribing in older patients was devised and implemented.                 | Needs assessment; four case studies and own examples; facilitated discussion.                                                         | Learning outcomes seemed achieved; 79.9% of cases were deprescribed; sharing experiences helped them change practice | Irish CME groups                                |

## Supplemental material 7 Study characteristics

| Author year                     | Country           | Study design           | Setting | Participants, professional background | Study duration | Objective and intervention setting                                                                                            | Facilitation and group dynamics                                                                                            | Didactic and QI technique                                                                             | Outcome oriented data                                                                                          | Common characteristics of the cluster (kinship) |
|---------------------------------|-------------------|------------------------|---------|---------------------------------------|----------------|-------------------------------------------------------------------------------------------------------------------------------|----------------------------------------------------------------------------------------------------------------------------|-------------------------------------------------------------------------------------------------------|----------------------------------------------------------------------------------------------------------------|-------------------------------------------------|
| Mahlknecht 2020 <sup>102</sup>  | Austria and Italy | Before and after study | PHC     | 56 GPs                                | 2 years        | To assess the changes in quality of life (QoL) and patient satisfaction of chronically ill patients in Tyrol and South Tyrol. | Not described                                                                                                              | Intervention consisted of self-audit, benchmarking and QCs                                            | The impact of the intervention was not significant within the intermediate time periods analysed in the study. | QCs in Tyrol (Austria and Italy)                |
| Mercer 2020 <sup>103</sup>      | Scotland          | Survey                 | PHC     | 4371 GPs                              | Not applicable | To determine GPs' views on QCs.                                                                                               | QC participants were asked to what extent QCs were: 1) well organised; 2) friendly; 3) well facilitated; and 4) productive | Not applicable                                                                                        | 2456 responses were received from 4371 GPs (56.4%). QCs are in need of more support to improve quality of care | Scottish PBSGL                                  |
| Plüss-Suard 2020 <sup>104</sup> | Switzerland       | Before and after study | PHC     | GPs, nurses and pharmacists           | 6 Years        | To describe antibacterial use in long-term care facilities and to investigate the determinants of use.                        | Improving the enforcement of clinical guidelines within long term care facilities prescribing practices.                   | Benchmarking, analysis of attitudes towards guidelines, building consensus and evaluation of results. | Antibacterial use decreased from 45.6 to 35.5 DDD per 1000 beds per day.                                       | Swiss QC on drug prescription                   |

## Supplemental material 7 Study characteristics

| Author year                      | Country | Study design                                                                   | Setting | Participants, professional background                   | Study duration | Objective and intervention setting                                                                                                              | Facilitation and group dynamics                                                | Didactic and QI technique                                                                                                                                    | Outcome oriented data                                                                                                     | Common characteristics of the cluster (kinship)                                               |
|----------------------------------|---------|--------------------------------------------------------------------------------|---------|---------------------------------------------------------|----------------|-------------------------------------------------------------------------------------------------------------------------------------------------|--------------------------------------------------------------------------------|--------------------------------------------------------------------------------------------------------------------------------------------------------------|---------------------------------------------------------------------------------------------------------------------------|-----------------------------------------------------------------------------------------------|
| Kamradt 2018 <sup>105</sup>      | Germany | Study protocol: three-armed cluster randomised trial compared to standard care | PHC     | 193 practices                                           | 3 years        | To examine the change of the antibiotic prescription rate within three intervention arms and the comparison between the three intervention arms | Various social mechanisms influence the spread of new attitudes and behaviours | A: e-learning, QCs, data feedback<br>B: A plus in addition, feedback tailored for practice staff<br>C: A plus computerized support and multiprofessional QC. | Established indicators of the European Surveillance of Antimicrobial Consumption Network. Process evaluation: interviews. | German QC for rational antibiotic prescribing patterns. Effectiveness study is still pending. |
| Poss-Doering 2020 <sup>106</sup> | Germany | Evaluation: interviews and surveys                                             | PHC     | 76 GPs and 80 medical assistants                        | Not applicable | To describe the individual and organizational factors affecting the uptake of this multi-faceted program using surveys and interviews           | Not applicable                                                                 | Not applicable                                                                                                                                               | Highest uptake gave feedback reports, background information, e-learning modules and disease-specific QCs.                |                                                                                               |
| Poss-Doering 2020 <sup>107</sup> | Germany | Evaluation: interviews                                                         | PHC     | GPs, medical assistants and stakeholder representatives | Not applicable | To explore factors and processes attributed to the network's contribution to improving antibiotic prescribing.                                  | Not applicable                                                                 | Not applicable                                                                                                                                               | Professional peer exchange, social support and reassurance contributed to behaviour change.                               |                                                                                               |

## Supplemental material 7 Study characteristics

| Author year                 | Country  | Study design           | Setting | Participants, professional background | Study duration | Objective and intervention setting                                                                                              | Facilitation and group dynamics | Didactic and QI technique | Outcome oriented data                                                                                          | Common characteristics of the cluster (kinship)                 |
|-----------------------------|----------|------------------------|---------|---------------------------------------|----------------|---------------------------------------------------------------------------------------------------------------------------------|---------------------------------|---------------------------|----------------------------------------------------------------------------------------------------------------|-----------------------------------------------------------------|
| Stewart 2020 <sup>108</sup> | Scotland | Evaluation: interviews | PHC     | GPs, secondary care doctors           | Not applicable | To identify the perceptions and experiences of participants in mixed groups of general practitioners and secondary care doctors | Not applicable                  | Not applicable            | There was desire to improve working relationships; logistics of arranging further meetings seemed challenging. | Scottish PBSGL in mixed groups (GPs and secondary care doctors) |

**Supplemental material 7      Study characteristics**

1. Gjelstad S, Fetveit A, Straand J, et al. Can antibiotic prescriptions in respiratory tract infections be improved? A cluster-randomized educational intervention in general practice - The Prescription Peer Academic Detailing (Rx-PAD) Study [NCT00272155]. *BMC Health Services Research* 2006;6(1):75.
2. Gjelstad S, Høye S, Straand J, et al. Improving antibiotic prescribing in acute respiratory tract infections: cluster randomised trial from Norwegian general practice (prescription peer academic detailing (Rx-PAD) study). *BMJ* 2013;347:f4403. doi: 10.1136/bmj.f4403 [published Online First: 2013/07/31]
3. Straand J, Fetveit A, Rognstad S, et al. A cluster-randomized educational intervention to reduce inappropriate prescription patterns for elderly patients in general practice - The Prescription Peer Academic Detailing (Rx-PAD) study [NCT00281450]. *BMC Health Services Research* 2006;6(1):72.
4. Brekke M, Rognstad S, Straand J, et al. Pharmacologically inappropriate prescriptions for elderly patients in general practice: How common? Baseline data from The Prescription Peer Academic Detailing (Rx-PAD) study. *Scand J Prim Health Care* 2008;26(2):80-85. doi: 10.1080/02813430802002875 [published Online First: 2008/06/24]
5. Rognstad S, Brekke M, Fetveit A, et al. Prescription peer academic detailing to reduce inappropriate prescribing for older patients: a cluster randomised controlled trial. *Br J Gen Pract* 2013;63(613):e554-62. doi: 10.3399/bjgp13X670688 [published Online First: 2013/08/27]
6. Frich J, Høye S, Lindbaek M, et al. General practitioners and tutors' experiences with peer group academic detailing: a qualitative study. *BMC Family Practice* 2010;11(1):1-7.
7. Geboers H, van der Horst M, Mokkink H, et al. Setting up improvement projects in small scale primary care practices: feasibility of a model for continuous quality improvement. *Quality in Health Care* 1999;8(1):36-42.
8. Geboers H, Mokkink H, van Montfort P, et al. Continuous quality improvement in small general medical practices: the attitudes of general practitioners and other practice staff. *Int J Qual Health Care* 2001;13(5):391-7.
9. Engels Y, Verheijen N, Fleuren M, et al. The effect of small peer group continuous quality improvement on the clinical practice of midwives in The Netherlands. *Midwifery* 2003;19(4):250-8.
10. Engels Y, van den Hombergh P, Mokkink H, et al. The effects of a team-based continuous quality improvement intervention on the management of primary care: a randomised controlled trial. *British Journal of General Practice* 2006;56(531):781-7.
11. Verstappen WH, van der Weijden T, Sijbrandij J, et al. Effect of a practice-based strategy on test ordering performance of primary care physicians: a randomized trial. *JAMA* 2003;289(18):2407-12. [published Online First: 2003/05/15]
12. Verstappen WH, van der Weijden T, Dubois WI, et al. Improving test ordering in primary care: the added value of a small-group quality improvement strategy compared with classic feedback only. *Ann Fam Med* 2004;2(6):569-75. [published Online First: 2004/12/04]

**Supplemental material 7      Study characteristics**

13. Verstappen WH, van Merode F, Grimshaw J, et al. Comparing cost effects of two quality strategies to improve test ordering in primary care: a randomized trial. *Int J Qual Health Care* 2004;16(5):391-8. [published Online First: 2004/09/18]
14. Verstappen WHJ, Dubois WI, Smeele IJM, et al. Lessons learnt from applying an innovative, small group quality improvement strategy on test ordering in general practice. *Quality in Primary Care* 2004;12(1):79-85.
15. Smeele IJ, Grol RP, van Schayck CP, et al. Can small group education and peer review improve care for patients with asthma/chronic obstructive pulmonary disease? *Qual Health Care* 1999;8(2):92-8. [published Online First: 1999/11/11]
16. Kasje WN, Denig P, Stewart RE, et al. An educational programme for peer review groups to improve treatment of chronic heart failure and diabetes mellitus type 2 in general practice. *J Eval Clin Pract* 2006;12(6):613-21. doi: 10.1111/j.1365-2753.2005.00625.x [published Online First: 2006/11/15]
17. van Eijk MEC, Avorn J, Porsius AJ, et al. Reducing prescribing of highly anticholinergic antidepressants for elderly people: randomised trial of group versus individual academic detailing. *British Medical Journal* 2001;322(7287):1-6. doi: 10.1136/bmj.322.7287.654
18. Welschen I, Kuyvenhoven MM, Hoes AW, et al. Effectiveness of a multiple intervention to reduce antibiotic prescribing for respiratory tract symptoms in primary care: randomised controlled trial. *BMJ* 2004;329(7463):431. doi: 10.1136/bmj.38182.591238.EB [published Online First: 2004/08/07]
19. Davis P, Andrews E, Donen N, et al. Case studies in osteoporosis: a problem based learning intervention for family physicians. *Journal of Rheumatology* 1999;26(11):2418-22.
20. McSherry J, Weiss R. Managing benign prostatic hyperplasia in primary care. Patient-centred approach. *Canadian family physician Medecin de famille canadien* 2000;46:383-89.
21. Peloso PM, Stakiw KJ. Small-group format for continuing medical education: a report from the field. *The Journal of continuing education in the health professions* 2000;20(1):27-32. doi: 10.1002/chp.1340200106 [published Online First: 2001/03/10]
22. Herbert CP, Wright JM, Maclure M, et al. Better Prescribing Project: a randomized controlled trial of the impact of case-based educational modules and personal prescribing feedback on prescribing for hypertension in primary care. *Fam Pract* 2004;21(5):575-81. doi: 10.1093/fampra/cmh515
23. MacVicar R, Cunningham D, Cassidy J, et al. Applying evidence in practice through small group learning: A Scottish pilot of a Canadian programme. *Education for Primary Care* 2006;17(5):465-72.
24. Armson H, Kinzie S, Hawes D, et al. Translating learning into practice: lessons from the practice-based small group learning program. *Canadian Family Physician* 2007;53(9):1477-85.

**Supplemental material 7      Study characteristics**

25. Kelly DR, Cunningham DE, McCalister P, et al. Applying evidence in practice through small-group learning: a qualitative exploration of success. *Quality in Primary Care* 2007;15(2):93-99.
26. Overton GK, Kelly D, McCalister P, et al. The practice-based small group learning approach: making evidence-based practice come alive for learners. *Nurse Education Today* 2009;29(6):671-5.
27. Cunningham D, McCalister P, Macvicar R. Practice-based small group learning: what are the motivations to become and continue as a facilitator? A qualitative study. *Quality in Primary Care* 2011;19(1):5-12.
28. Rial J, Scallan S. Practice-based small group learning (PBSGL) for CPD: a pilot with general practice trainees to support the transition to independent practice. *Education for Primary Care* 2013;24(3):173-7.
29. Ioannidis G, Papaioannou A, Thabane L, et al. Canadian Quality Circle pilot project in osteoporosis: rationale, methods, and feasibility. *Canadian family physician Médecin de famille canadien* 2007(10):1694-700.
30. Ioannidis G, Thabane L, Gafni A, et al. Optimizing care in osteoporosis: the Canadian quality circle project. *BMC Musculoskelet Disord* 2008;9:130. [published Online First: 2008/10/03]
31. Ioannidis G, Papaioannou A, Thabane L, et al. The utilization of appropriate osteoporosis medications improves following a multifaceted educational intervention: the Canadian quality circle project (CQC). *BMC Medical Education* 2009;9:1-8. doi: DOI: 10.1186/1472-6920-9-54
32. Szecsenyi J, Bar H, Claus E, et al. Halsschmerzpatienten als Thema eines hausärztlichen Qualitätszirkels. Bestandsaufnahme und Erarbeitung einer Handlungsleitlinie. *Fortschritte der Medizin* 1994;112(17):245-50.
33. Gerlach FM, Bahrs O, Weiss-Plumeyer M. Fallorientiertes Arbeiten im Qualitätszirkel. *Zeitschrift für ärztliche Fortbildung* 1995;89(4):397-401.
34. Hartmann P, Grusser M, Jorgens V. Strukturierte kassenärztliche Qualitätszirkel zum Thema Diabetikerbetreuung in der Praxis. *Zeitschrift für ärztliche Fortbildung* 1995;89(4):415-18.
35. Murad I. Evaluation hausärztlicher Qualitätszirkel in Auen/Sachsen. *Zeitschrift für Allgemeinmedizin* 1998;74(22):1039-43.
36. Tausch B, Harter M, Niebling W, et al. Implementierung und Evaluation von Qualitätszirkeln in der hausärztlichen Versorgung. *Zeitschrift für ärztliche Fortbildung* 1995;89(4):402-05.
37. Tausch B, Harter M. Zielanalyse von Teilnehmern und Moderatoren hausärztlicher Qualitätszirkel. *Zeitschrift für ärztliche Fortbildung* 1996;90(5):454-58.



**Supplemental material 7      Study characteristics**

38. Tausch BD, Harter MC. Perceived effectiveness of diagnostic and therapeutic guidelines in primary care quality circles. *Int J Qual Health Care* 2001;13(3):239-46. [published Online First: 2001/07/31]
39. Andres E, Szecsenyi J, Broge B. Qualitätszirkel mit Schwerpunkt Pharmakotherapie in Nordhessen: Bewertung aus Sicht der Teilnehmer. *Gesundheitswesen (Bundesverband der Ärzte des Öffentlichen Gesundheitsdienstes (Germany))* 1997;59(4):262-66.
40. Andres E. Rund um die Pille: Qualitätszirkel zur Pharmakotherapie - rund 800 Teilnehmer bewerten die erste Projektrunde als positiv. *Niedersächsisches Ärzteblatt* 2004(10)
41. Wensing M, Broge B, Kaufmann-Kolle P, et al. Quality circles to improve prescribing patterns in primary medical care: what is their actual impact? *J Eval Clin Pract* 2004;10(3):457-66. [published Online First: 2004/08/12]
42. Andres E. Bisher grösstes Projekt Hausärztliche Qualitätszirkel zur Pharmakotherapie in Hessen konnte erfolgreich abgeschlossen werden. Eine Betrachtung aus der Sicht der teilnehmenden Ärzte. *Hessisches Ärzteblatt* 2004;8:64-66.
43. Fessler J, Gross J, Papendick H, et al. Qualitative und ökonomische Auswirkungen der Implementierung hausärztlicher Leitlinien in einem Ärztenetz. *Zeitschrift für ärztliche Fortbildung und Qualitätssicherung : in Zusammenarbeit mit der Kaiserin-Friedrich-Stiftung für das ärztliche Fortbildungswesen* 2006;100(2):107-12.
44. Papendick H, Fessler J, Gross J. Entwicklung der Arzneimittelkosten in einem Ärztenetz und Vergleichsgruppen nach Intervention in Qualitätszirkeln. *Zeitschrift für ärztliche Fortbildung und Qualitätssicherung : in Zusammenarbeit mit der Kaiserin-Friedrich-Stiftung für das ärztliche Fortbildungswesen* 2006;100(2):150-56.
45. Wensing M, Broge B, Riens B, et al. Quality circles to improve prescribing of primary care physicians. Three comparative studies. *Pharmacoepidemiology and drug safety* 2009;18(9):763-9. doi: 10.1002/pds.1778 [published Online First: 2009/06/10]
46. Andres E, Beyer M, Schorsch B, et al. Qualitätszirkel in der vertragärztlichen Versorgung: Ergebnisse der kontinuierlichen Basisdokumentation in Bremen, Sachsen-Anhalt, Schleswig-Holstein und Westfalen-Lippe 1995 bis 2007. *Zeitschrift für Evidenz, Fortbildung und Qualität im Gesundheitswesen* 2010;104(1):51-58.
47. Beyer M, Gerlach FM, Breull A. Qualitätsförderung und Qualitätszirkel aus der Sicht niedergelassener Ärztinnen und Ärzte--repräsentative Ergebnisse aus Bremen und Sachsen-Anhalt . *Zeitschrift für ärztliche Fortbildung und Qualitätssicherung* 1999;93(9):677-87.
48. Aubke W, Beyer M, Gerlach FM, et al. Ärztliche Qualitätszirkel: Positive Auswirkung auf Arzt-Patient-Beziehung. *Dtsch Arztebl International* 2003;2(2):65-66.

**Supplemental material 7 Study characteristics**

49. Beyer M, Gerlach FM, Flies U, et al. The development of quality circles/peer review groups as a method of quality improvement in Europe. Results of a survey in 26 European countries. *Fam Pract* 2003;20(4):443-51. [published Online First: 2003/07/24]
50. Mols V, Jahn H, Hetzel A, et al. Qualitätszirkel in der Sekundärprävention nach Schlaganfall—eine kontrollierte Interventionsstudie. *Z Allg Med* 2005;81:435-41.
51. Schneider A, Wensing M, Biessecker K, et al. Impact of quality circles for improvement of asthma care: results of a randomized controlled trial. *J Eval Clin Pract* 2007;14(2):185-90. [published Online First: 2007/12/21]
52. Vollmar HC, Butzlaff ME, Lefering R, et al. Knowledge translation on dementia: a cluster randomized trial to compare a blended learning approach with a "classical" advanced training in GP quality circles. *BMC Health Services Research* 2007;7:1-15. doi: doi:10.1186/1472-6963-7-92
53. Vollmar HC, Rieger MA, Butzlaff ME, et al. General Practitioners' preferences and use of educational media: a German perspective. *BMC Health Serv Res* 2009;9:1-11. doi: 10.1186/1472-6963-9-31 [published Online First: 2009/02/18]
54. Vollmar H, Mayer H, Ostermann T, et al. Knowledge transfer for the management of dementia: a cluster-randomised trial of blended learning in general practice. *Implementation Science* 2010;5(1):1-10. doi: doi:10.1186/1748-5908-5-1
55. Siebolds M, Diel F, Quasdorf I. Qualitätszirkel: Selbstbestimmtes Lehren und Lernen. *Dtsch Arztebl International* 2012;109(38):1872-4.
56. Bugnon O, Niquille A, Repond C, et al. Les cercles de qualité médecinspharmaciens: un réseau local reconnu pour maîtriser les coûts et la qualité de la prescription médicale. *Medecine et Hygiene* 2004;62(2501):2054-58.
57. Niquille A, Ruggli M, Buchmann M, et al. The nine-year sustained cost-containment impact of swiss pilot physicians-pharmacists quality circles. *The Annals of pharmacotherapy* 2010;44(4):650-7. doi: 10.1345/aph.1M537 [published Online First: 2010/03/11]
58. Lundborg CS, Wahlstrom R, Oke T, et al. Influencing prescribing for urinary tract infection and asthma in primary care in Sweden: a randomized controlled trial of an interactive educational intervention. *J Clin Epidemiol* 1999;52(8):801-12. [published Online First: 1999/08/28]
59. Lundborg CS, Wahlstrom R, Diwan VK, et al. Combining feedback from simulated cases and prescribing. Design and implementation of an educational intervention in primary care in Sweden. *Int J Technol Assess Health Care* 1999;15(3):458-72. [published Online First: 2000/06/30]
60. Lagerlov P, Loeb M, Andrew M, et al. Improving doctors' prescribing behaviour through reflection on guidelines and prescription feedback: a randomised controlled study. *Qual Health Care* 2000;9(3):159-65. doi: 10.1136/qhc.9.3.159

**Supplemental material 7 Study characteristics**

61. Veninga CCM, Øv PL, Wahlström R, et al. Evaluating an Educational Intervention to Improve the Treatment of Asthma in Four European Countries. *American Journal of Respiratory and Critical Care Medicine* 1999;160(4):1254-62. doi: 10.1164/ajrcm.160.4.9812136
62. Veninga CCM, Denig P, Zwaagstra R, et al. Improving drug treatment in general practice. *Journal of Clinical Epidemiology* 2000;53(7):762-72. doi: 10.1016/s0895-4356(00)00194-3
63. Eliasson G, Mattsson B. From teaching to learning. Experiences of small CME group work in general practice in Sweden. *Scand J Prim Health Care* 1999;17(4):196-200. [published Online First: 2000/02/16]
64. Watkins C, Timm A, Gooberman-Hill R, et al. Factors affecting feasibility and acceptability of a practice-based educational intervention to support evidence-based prescribing: a qualitative study. *Fam Pract* 2004;21(6):661-9. doi: 10.1093/fampra/cmh614 [doi] [published Online First: 2004/11/06]
65. Tonies H, Maier M, Bawert A. Medical quality circles for drug replacement therapy. [German] Verbesserte umsetzung der substitutionstherapie bei drogenabhängigen durch qualitätszirkel für arzte. *Wiener Medizinische Wochenschrift* 2006;156(15-16):448-50.
66. Riou F, Piette C, Durand G, et al. Results of a 12-month quality-circle prescribing improvement programme for GPs. *Br J Gen Pract* 2007;57(540):574-6.
67. van Driel ML, Coenen S, Dirven K, et al. What is the role of quality circles in strategies to optimise antibiotic prescribing? A pragmatic cluster-randomised controlled trial in primary care. *Quality & Safety in Health Care* 2007;16(3):197-202.
68. Spiegel W, Mlczoch-Czerny MT, Jens R, et al. Quality circles for pharmacotherapy to modify general practitioners' prescribing behaviour for generic drugs. *Journal of Evaluation in Clinical Practice* 2012;18(4):828-34.
69. de Villiers M, Bresick G, Mash B. The value of small group learning: an evaluation of an innovative CPD programme for primary care medical practitioners. *Medical Education* 2003;37(9):815-21.
70. Richards D, Toop L, Graham P. Do clinical practice education groups result in sustained change in GP prescribing? *Family Practice* 2003;20(2):199-206. doi: 10.1093/fampra/20.2.199
71. Parker LE, de Pillis E, Altschuler A, et al. Balancing participation and expertise: a comparison of locally and centrally managed health care quality improvement within primary care practices. *Qualitative health research* 2007;17(9):1268-79.
72. Sommers LS, Morgan L, Johnson L, et al. Practice inquiry: clinical uncertainty as a focus for small-group learning and practice improvement. *J Gen Intern Med* 2007;22(2):246-52. doi: 10.1007/s11606-006-0059-2 [published Online First: 2007/03/16]

**Supplemental material 7      Study characteristics**

73. Murrilhy RC, Byrne MK, Gonsalvez CJ. Testing an empirically derived mental health training model featuring small groups, distributed practice and patient discussion. *Med Educ* 2009;43(2):140-5. doi: 10.1111/j.1365-2923.2008.03256.x [published Online First: 2009/01/24]
74. Fisher DM, Brenner CJ, Cheren M, et al. Engagement of groups in family medicine board maintenance of certification. *Journal of the American Board of Family Medicine: JABFM* 2013;26(2):149-58.
75. Francois P, Philibert AC, Esturillo G, et al. Groupes d'échange de pratique entre pairs : un modèle pour le développement professionnel continu en médecine générale. *Presse Médicale* 2013;42(1):e21-e27.
76. Wilcock J, Iliffe S, Griffin M, et al. Tailored educational intervention for primary care to improve the management of dementia: The EVIDEM-ED cluster randomized controlled trial. *Trials* 2013;14 (1) (no pagination)(397)
77. Andres E, Ludt S, Mainz A, et al. 20 years of quality circles for family practitioners - Stocktaking and perspectives: A workshop report. [German]. *Zeitschrift für Allgemeinmedizin* 2015;91(2):66-70.
78. Dowling S, Finnegan H, Collins C. Does participation in CME SLG (small group learning) influence medical practice? The experience of general practitioners attending CME SLG after the introduction of the Medical Practitioners Act. *Irish medical journal* 2015;108(4):109-11. [published Online First: 2015/05/29]
79. Verbakel NJ, Langelaan M, Verheij TJM, et al. Effects of patient safety culture interventions on incident reporting in general practice: A cluster randomised trial a cluster randomised trial. *British Journal of General Practice* 2015;65(634):e319-e29.
80. Mahlkecht A, Abuzahra ME, Piccoliori G, et al. Improving quality of care in general practices by self-audit, benchmarking and quality circles. *Wiener klinische Wochenschrift* 2016;128(19-20):706-18.
81. Vervloet M, Meulepas MA, Cals JW, et al. Reducing antibiotic prescriptions for respiratory tract infections in family practice: results of a cluster randomized controlled trial evaluating a multifaceted peer-group-based intervention. *NPJ Primary Care Respiratory Medicine* 2016;26:1-6.
82. Jäger C, Freund T, Steinhäuser J, et al. A tailored implementation intervention to implement recommendations addressing polypharmacy in multimorbid patients: Study protocol of a cluster randomized controlled trial. *Trials* 2013;14 (1) (no pagination)(420)
83. Jäger C, Szecsenyi J, Steinhäuser J. Design and Delivery of a Tailored Intervention to Implement Recommendations for Multimorbid Patients Receiving Polypharmacy into Primary Care Practices. *BioMed Research International* 2015;2015:1-9. doi: 10.1155/2015/938069

**Supplemental material 7 Study characteristics**

84. Jäger C, Freund T, Steinhauser J, et al. Impact of a tailored program on the implementation of evidence-based recommendations for multimorbid patients with polypharmacy in primary care practices-results of a cluster-randomized controlled trial. *Implementation Science* 2017;12(1):1-8. doi: 10.1186/s13012-016-0535-y
85. Jäger C, Steinhauser J, Freund T, et al. A tailored programme to implement recommendations for multimorbid patients with polypharmacy in primary care practices-process evaluation of a cluster randomized trial. *Implement Sci* 2017;12(1):31. doi: 10.1186/s13012-017-0559-y [published Online First: 2017/03/08]
86. Ter Brugge BPH, Bartelink MEL, Damoiseaux R, et al. The use of evidence during group meetings of Dutch general practitioners. *Education for Primary Care* 2017;28(6):307-12.
87. Trietsch J, van Steenkiste B, Grol R, et al. Effect of audit and feedback with peer review on general practitioners' prescribing and test ordering performance: a cluster-randomized controlled trial. *BMC Fam Pract* 2017;18(1):53. doi: 10.1186/s12875-017-0605-5 [published Online First: 2017/04/15]
88. Andres E, Bleek J, Stock J, et al. Messen, Bewerten, Handeln: Qualitätsindikatoren zur KoronarenHerzkrankheit im Praxistest. *Zeitschrift fur Evidenz Fortbildung und Qualitat im Gesundheitswesen* 2018;137-138:9-19.
89. Binienda J, Neale AV, Wallace LS. Future directions for practice-based research networks (PBRNs): A CERA survey. *Journal of the American Board of Family Medicine* 2018;31(6):917-23.
90. Král N, Seifert B, Kovář J, et al. The use of quality circles as a support tool in the taking over of practices by young general practitioners. *Journal of Family Medicine and Primary Care* 2018;7(1):5-10. doi: 10.4103/jfmpc.jfmpc\_167\_17
91. Park J, Cunningham DE. The recruitment of new members to existing PBSGL small groups: a qualitative study. *Education for Primary Care* 2018;1-7. doi: 10.1080/14739879.2018.1460867
92. Pedersen MS, Landheim A, Moller M, et al. Acting on audit & feedback: a qualitative instrumental case study in mental health services in Norway. *BMC health services research* 2018;18(1):71.
93. Rognstad S, Brekke M, Gjelstad S, et al. Potentially Inappropriate Prescribing to Older Patients: Criteria, Prevalence and an Intervention to Reduce It: The Prescription Peer Academic Detailing (Rx-PAD) Study - A Cluster-Randomized, Educational Intervention in Norwegian General Practice. *Basic & clinical pharmacology & toxicology* 2018;123(4):380-91. doi: 10.1111/bcpt.13040 [published Online First: 2018/05/13]
94. Rognstad S, Brekke M, Mdala I, et al. Characteristics of GPs responding to an educational intervention to minimise inappropriate prescriptions: subgroup analyses of the Rx-PAD study. *BJGP Open* 2018;2(1):bjgpopen18X101373. doi: 10.3399/bjgpopen18X101373

**Supplemental material 7      Study characteristics**

95. Willman AS. Determining the educational impact of the introduction of practice-based small group learning within an intraprofessional group of doctors. *Journal of the Royal Army Medical Corps* 2018;164(3):160-63. doi: 10.1136/jramc-2017-000856 [published Online First: 2018/01/14]
96. Cunningham DE, Zlotos L. Practice-Based Small Group Learning (PBSGL) in Scotland: the past, the present and the future. *Education for Primary Care* 2019;30(6):337-41. doi: 10.1080/14739879.2019.1666662
97. Dowling S, Last J, Finnegan H, et al. Does locally delivered small group continuing medical education (CME) meet the learning needs of rural general practitioners? *Education for Primary Care* 2019;30(3):145-51. doi: 10.1080/14739879.2019.1573109
98. Martin Y, Braun LA, Janggen M-A, et al. Offering patients a choice for colorectal cancer screening: a quality improvement pilot study in a quality circle of primary care physicians. *BMJ Open Quality* 2019;8(4):e000670. doi: 10.1136/bmj-2019-000670
99. Siebenhofer A, Ulrich L-R, Mergenthal K, et al. Primary care management for patients receiving long-term antithrombotic treatment: A cluster-randomized controlled trial. *PloS one* 2019;14(1):e0209366. doi: 10.1371/journal.pone.0209366
100. Armson H, Wycliffe-Jones K, Mackay MP, et al. Academic Half-Days: Facilitated Small Groups to Promote Interactive Learning. *Family medicine* 2020;52(1):53-64. doi: 10.22454/fammed.2020.947981
101. Dowling S, Last J, Finnegan H, et al. How does small group continuing medical education (CME) impact on practice for rural GPs and their patients, a mixed-methods study. *Education for Primary Care* 2020;31(3):153-61. doi: 10.1080/14739879.2020.1728704
102. Mahlknecht A, Abuzahra ME, Piccoliori G, et al. Are quality promotion initiatives in Austrian and Italian general practices associated with higher patient satisfaction and quality of life? Results from the interventional study 'IQuaB'. *Health & Social Care in the Community* 2020 doi: 10.1111/hsc.13212
103. Mercer S, Gillies J, Fitzpatrick B. Progress of GP clusters 2 years after their introduction in Scotland: findings from the Scottish School of Primary Care national GP survey. *BJGP Open* 2020:bjgpopen20X101112. doi: 10.3399/bjgpopen20X101112
104. Pluss-Suard C, Niquille A, Hequet D, et al. Decrease in Antibacterial Use and Facility-Level Variability After the Introduction of Guidelines and Implementation of Physician-Pharmacist-Nurse Quality Circles in Swiss Long-term Care Facilities. *Journal of the American Medical Directors Association* 2020;21(1):78-83.
105. Kamradt M, Kaufmann-Kolle P, Andres E, et al. Sustainable reduction of antibiotic-induced antimicrobial resistance (ARena) in German ambulatory care: study protocol of a cluster randomised trial. *Implementation Science* 2018;13(1) doi: 10.1186/s13012-018-0722-0
106. Poss-Doering R, Kuhn L, Kamradt M, et al. Fostering appropriate antibiotic use in a complex intervention: Mixed-methods process evaluation alongside the cluster-randomized trial arena. *Antibiotics* 2020;9(12):1-20.

**Supplemental material 7      Study characteristics**

107. Poss-Doering R, Kamradt M, Glassen K, et al. Promoting rational antibiotic prescribing for non-complicated infections: understanding social influence in primary care networks in Germany. *BMC Family Practice* 2020;21(1) doi: 10.1186/s12875-020-01119-8
108. Stewart L, Cunningham D. Practice-based small group learning (PBSGL) with mixed groups of general practitioners and secondary care doctors: a qualitative study. *Education for Primary Care* 2020:1-6. doi: 10.1080/14739879.2020.1850213
